# Supplementary material for: Open sharing of genomic data: Who does it and why?
Source: PLoS One. 2017 May 9;12(5):e0177158. doi: 10.1371/journal.pone.0177158 (PMC5423632; doi:10.1371/journal.pone.0177158)
Supplement: S1 Table — (XLS) [file pone.0177158.s002.xls]

## Sheet: Sheet1
What is your gender?	What is your year of birth?	What is the highest degree or level of education you have completed?	Do you have children?	Are you engaged with biomedical research? (multiple answers possible) - no	Are you engaged with biomedical research? (multiple answers possible) - yes, as a professional	Are you engaged with biomedical research? (multiple answers possible) - yes, as a research participant	In which country do you live?	Have you ever tested your DNA/genotype profile	Which service(s) did you use to test your DNA/genotype profile? (multiple answers possible) - 23andMe	Which service(s) did you use to test your DNA/genotype profile? (multiple answers possible) - bio.logis	Which service(s) did you use to test your DNA/genotype profile? (multiple answers possible) - deCODEme	Which service(s) did you use to test your DNA/genotype profile? (multiple answers possible) - GenePlanet	Which service(s) did you use to test your DNA/genotype profile? (multiple answers possible) - GeneleX	Which service(s) did you use to test your DNA/genotype profile? (multiple answers possible) - Pathway Genomics	Which service(s) did you use to test your DNA/genotype profile? (multiple answers possible) - Navigenics	Which service(s) did you use to test your DNA/genotype profile? (multiple answers possible) - dna.ancestry	Which service(s) did you use to test your DNA/genotype profile? (multiple answers possible) - Other services, please specify:	What were your interests in being tested? Please, rank the following options. - Ancestry	What were your interests in being tested? Please, rank the following options. - Health	What were your interests in being tested? Please, rank the following options. - Contribution to research	Has your DNA analysis helped you to improve your health or life style?	Do you have your genotype raw-data uploaded on openSNP?	How long ago did you upload your genotype raw-data?	How often do you visit openSNP?	In addition to your genotype raw-data, did you upload other data on openSNP?<em> </em>(multiple answers possible) - no, I am not interested in uploading other data	In addition to your genotype raw-data, did you upload other data on openSNP?<em> </em>(multiple answers possible) - no, not yet but probably in the future	In addition to your genotype raw-data, did you upload other data on openSNP?<em> </em>(multiple answers possible) - yes, phenotypes	In addition to your genotype raw-data, did you upload other data on openSNP?<em> </em>(multiple answers possible) - yes, ZIP code	In addition to your genotype raw-data, did you upload other data on openSNP?<em> </em>(multiple answers possible) - yes, profile picture	Have you yourself already created one or more new phenotype(s)?	Have you ever contacted other users by use of the messaging function on openSNP?	Have you ever met someone in person with whom you corresponded via <em>openSNP</em>?	Have you ever downloaded data from openSNP to conduct own research or statistical analysis?	How carefully did you read the terms and conditions for sharing data while registering on openSNP?	Have you ever considered deleting your profile or data on openSNP?	Do you share your genotype raw-data in other networks? (multiple answers possible) - no	Do you share your genotype raw-data in other networks? (multiple answers possible) - Personal Genome Project	Do you share your genotype raw-data in other networks? (multiple answers possible) - Genomera	Do you share your genotype raw-data in other networks? (multiple answers possible) - OpenHumans	Do you share your genotype raw-data in other networks? (multiple answers possible) - DNA.land	Do you share your genotype raw-data in other networks? (multiple answers possible) - Your own personal website	Do you share your genotype raw-data in other networks? (multiple answers possible) - In other networks, please specify:	Do you have a publicly accessible profile on social networks? (multiple answers possible) - no	Do you have a publicly accessible profile on social networks? (multiple answers possible) - yes, on Facebook	Do you have a publicly accessible profile on social networks? (multiple answers possible) - yes, on Twitter	Do you have a publicly accessible profile on social networks? (multiple answers possible) - yes, on Google+	Do you have a publicly accessible profile on social networks? (multiple answers possible) - yes, on PatientsLikeMe	Do you have a publicly accessible profile on social networks? (multiple answers possible) - Yes, on other social networks, please specify:	Did you speak with others before making the decision to join openSNP? (multiple answers possible) - no
male	1960	doctorate (Ph.D.)	yes	no			France	yes	23andMe									3	1	2	to a small extent	yes	a few months ago but less than two years	I visit openSNP occasionally		no, not yet but probably in the future				no, not yet but probably in the future	no, not yet but probably in the future	no, but I would definitely like to	no, not yet but probably in the future	I read them carefully	yes	no							no						no
male	1970	doctorate (Ph.D.)	no		yes, as a professional		United States	yes	23andMe									2	1	3	to a moderate extent	no
male	1990	master's degree	no	no			France	yes	23andMe									1	3	2	not at all	yes	a few months ago but less than two years	I visit openSNP occasionally			yes, phenotypes			no, not yet but probably in the future	no, I am not interested in contacting other users	no, I am not interested in meeting other users	no, not yet but probably in the future	I did not read them at all	no	no								yes, on Facebook
female	1984	doctorate (Ph.D.)	no	no			United States	yes	23andMe									1	2	3	to a small extent	yes	a few months ago but less than two years	I visited openSNP a few times since data upload	no, I am not interested in uploading other data					no, not yet but probably in the future		no, I am not interested in meeting other users	no, I am not interested in downloading data to conduct analyses	I read them carefully	no	no							no
male	1966	doctorate (Ph.D.)	no	no			Germany	yes	23andMe										1	2	to a small extent	yes	a few months ago but less than two years	I visited openSNP a few times since data upload		no, not yet but probably in the future				no, not yet but probably in the future	no, not yet but probably in the future	no, I am not interested in meeting other users	no, not yet but probably in the future	I only read them over quickly	no	no								yes, on Facebook					no
male	1976	bachelor's degree	no	no			Brazil	yes	23andMe								FTDNA	3	2	1	to a small extent	no
female	1985	master's degree	no	no			Germany	yes	23andMe									2	1	3	to a moderate extent	yes	more than two years ago	I visited openSNP a few times since data upload		no, not yet but probably in the future	yes, phenotypes				no, not yet but probably in the future	no, I am not interested in meeting other users	no, not yet but probably in the future	I only read them over quickly	no	no								yes, on Facebook	yes, on Twitter				no
female	1982	bachelor's degree	no	no			United States	no
male	1980	bachelor's degree	yes	no			Canada	yes	23andMe									1	2	3	to a small extent	yes	a few months ago but less than two years	I visited openSNP a few times since data upload		no, not yet but probably in the future				no, not yet but probably in the future	no, not yet but probably in the future	no, not yet but probably in the future	no, not yet but probably in the future	I only read them over quickly	no	no								yes, on Facebook	yes, on Twitter	yes, on Google+			no
male	1976	less than high school	no	no			Switzerland	yes	23andMe									3	1	2	to a small extent	yes	a few months ago but less than two years	I visit openSNP occasionally			yes, phenotypes			no, not yet but probably in the future	no, not yet but probably in the future	no, not yet but probably in the future		I read them carefully	no				OpenHumans					yes, on Facebook	yes, on Twitter	yes, on Google+	yes, on PatientsLikeMe		no
female	1982	bachelor's degree	no	no			United States	yes	23andMe							dna.ancestry		2	1	was not relevant	to a large extent	yes	more than two years ago	I visit openSNP occasionally				yes, ZIP code	yes, profile picture	no, I am not interested in creating phenotypes	no, not yet but probably in the future	no, but I would definitely like to	yes	I only read them over quickly	yes		Personal Genome Project						no						no
female	1983	bachelor's degree	no	no			United States	yes								dna.ancestry		1	3	2	to a small extent	yes	a few months ago but less than two years	I visit openSNP occasionally			yes, phenotypes			no, not yet but probably in the future	no, I am not interested in contacting other users	no, I am not interested in meeting other users	no, I am not interested in downloading data to conduct analyses	I read them carefully	yes					DNA.land				yes, on Facebook	yes, on Twitter	yes, on Google+			no
male	1989	bachelor's degree	no	no			Indonesia	yes	23andMe									2	1	3	to a small extent	yes	a few months ago but less than two years	I visited openSNP a few times since data upload	no, I am not interested in uploading other data					no, I am not interested in creating phenotypes	no, I am not interested in contacting other users	no, I am not interested in meeting other users	no, I am not interested in downloading data to conduct analyses	I only read them over quickly	yes	no								yes, on Facebook	yes, on Twitter				no
male	1979	bachelor's degree	no	no			Germany	yes	23andMe									1	2	3	not at all	yes	a few months ago but less than two years	I visited openSNP a few times since data upload		no, not yet but probably in the future					no, I am not interested in contacting other users	no, I am not interested in meeting other users	no, I am not interested in downloading data to conduct analyses	I did not read them at all	no	no									yes, on Twitter				no
female	1958	bachelor's degree	yes	no			United States	no
male	1965	bachelor's degree	yes	no			United States	yes	23andMe									1	3	2	not at all	yes	a few months ago but less than two years	I visit openSNP occasionally		no, not yet but probably in the future				no, not yet but probably in the future	no, not yet but probably in the future	no, not yet but probably in the future	yes	I only read them over quickly	no					DNA.land				yes, on Facebook				LinkedIn
male	1980	master's degree	no			yes, as a research participant	Italy	yes	23andMe									3	1	2	to a small extent	yes	a few months ago but less than two years	I visit openSNP occasionally			yes, phenotypes	yes, ZIP code		yes	yes, I have contacted several people	no, I am not interested in meeting other users	no, not yet but probably in the future	I only read them over quickly	no	no								yes, on Facebook
female	1962	bachelor's degree	no	no			United States	yes	23andMe									2	1	was not relevant	to a moderate extent	no
male	1937	master's degree	no	no			United States	yes	23andMe								family tree	1	2	was not relevant	not at all	yes
male	1961	high school graduate	yes	no			United States	yes	23andMe									1	2	was not relevant	not at all	no
female	1945	bachelor's degree	yes	no			United States	yes									family tree dna	1	was not relevant	was not relevant	not at all	yes	a few months ago but less than two years	I visited openSNP a few times since data upload		no, not yet but probably in the future				no, I am not interested in creating phenotypes	no, not yet but probably in the future	no, not yet but probably in the future	no, not yet but probably in the future	I only read them over quickly	no	no								yes, on Facebook					no
female	1968	high school graduate	yes	no			United States	no
male	1958	doctorate (Ph.D.)	yes				United States	yes	23andMe										1	2	not at all	yes	a few months ago but less than two years	I visited openSNP a few times since data upload		no, not yet but probably in the future				no, not yet but probably in the future	no, not yet but probably in the future	no, but I would definitely like to	no, not yet but probably in the future	I only read them over quickly	no	no									yes, on Twitter
male	1984		no	no			United States	yes	23andMe								ftdna.com	2	1	3	not at all	yes	a few months ago but less than two years	I visited openSNP a few times since data upload		no, not yet but probably in the future				no, not yet but probably in the future	no, not yet but probably in the future	no, but I would definitely like to	no, I am not interested in downloading data to conduct analyses	I only read them over quickly	no		Personal Genome Project		OpenHumans	DNA.land				yes, on Facebook					no
female	1967	master's degree	yes	no			United States	yes	23andMe										3	1	to a moderate extent	yes	a few months ago but less than two years	I visited openSNP only for uploading data	no, I am not interested in uploading other data					no, I am not interested in creating phenotypes	no, I am not interested in contacting other users	no, I am not interested in meeting other users	no, I am not interested in downloading data to conduct analyses	I only read them over quickly	no	no							no						no
female	1955	bachelor's degree	yes	no			Australia	yes	23andMe									3	1	2	to a small extent	yes	a few months ago but less than two years	I visited openSNP a few times since data upload		no, not yet but probably in the future				no, not yet but probably in the future	no, not yet but probably in the future	no, I am not interested in meeting other users	no, I am not interested in downloading data to conduct analyses	I only read them over quickly	yes					DNA.land		Livewello, a practitioners site,		yes, on Facebook	yes, on Twitter	yes, on Google+	yes, on PatientsLikeMe		no
female	1959	master's degree	yes	no			United States	yes	23andMe									1	3	2	to a small extent	yes	more than two years ago	I visited openSNP a few times since data upload		no, not yet but probably in the future				no, not yet but probably in the future	yes, I have contacted only one person	no, but I would definitely like to	no, not yet but probably in the future	I did not read them at all	no	no								yes, on Facebook	yes, on Twitter	yes, on Google+			no
female	1966	high school graduate	yes	no			Australia	yes	23andMe									2	1	was not relevant	to a moderate extent	yes	more than two years ago	I visited openSNP a few times since data upload		no, not yet but probably in the future				no, not yet but probably in the future	yes, I have contacted only one person	no, but I would definitely like to	no, not yet but probably in the future	I only read them over quickly	no	no								yes, on Facebook	yes, on Twitter	yes, on Google+			no
male	1951	bachelor's degree	yes			yes, as a research participant	United States	yes	23andMe								Family DNA	1		2	not at all	yes	a few months ago but less than two years	I visited openSNP a few times since data upload			yes, phenotypes	yes, ZIP code		no, not yet but probably in the future	no, not yet but probably in the future	no, not yet but probably in the future	yes	I read them carefully	no						Your own personal website	ysearch		yes, on Facebook	yes, on Twitter	yes, on Google+			no
male	1978	bachelor's degree	no	no			Mexico	yes	23andMe		deCODEme					dna.ancestry		1	2	3	to a moderate extent	yes	more than two years ago	I visited openSNP only for uploading data		no, not yet but probably in the future				no, not yet but probably in the future	no, not yet but probably in the future	no, but I would definitely like to	no, not yet but probably in the future	I only read them over quickly	no	no							no						no
female	1986	high school graduate	no	no			United States	yes	23andMe								Whole exome sequencing by genetic dr for health reasons	3	1	2	to a small extent	yes	a few months ago but less than two years	I visit openSNP regularly			yes, phenotypes			no, not yet but probably in the future	yes, I have contacted only one person	no, I am not interested in meeting other users	yes	I only read them over quickly	no					DNA.land			no
male	1973	bachelor's degree	yes	no				yes	23andMe									2	1	3	to a small extent	yes	a few months ago but less than two years	I visited openSNP a few times since data upload	no, I am not interested in uploading other data					no, I am not interested in creating phenotypes	no, I am not interested in contacting other users	no, I am not interested in meeting other users	no, I am not interested in downloading data to conduct analyses	I read them carefully	no	no							no						no
male	1983	high school graduate	no	no			Germany	yes	23andMe									1	2	3	to a moderate extent	yes	a few months ago but less than two years	I visited openSNP a few times since data upload		no, not yet but probably in the future				no, not yet but probably in the future	no, not yet but probably in the future	no, but I would definitely like to	no, not yet but probably in the future	I read them carefully	no							Gedmatch		yes, on Facebook					no
other	1980	master's degree	no	no			United States	yes	23andMe									1	3	2	not at all	yes	a few months ago but less than two years	I visited openSNP only for uploading data		no, not yet but probably in the future				no, not yet but probably in the future	no, not yet but probably in the future	no, but I would definitely like to	no, not yet but probably in the future	I did not read them at all	no	no								yes, on Facebook		yes, on Google+			no
male	1989	high school graduate	no			yes, as a research participant	United States	yes	23andMe								Veritas Genetics	3	2	1	not at all	yes	a few months ago but less than two years	I visited openSNP a few times since data upload			yes, phenotypes			no, not yet but probably in the future	no, I am not interested in contacting other users	no, but I would definitely like to	no, not yet but probably in the future	I read them carefully	no		Personal Genome Project					GitHub		yes, on Facebook	yes, on Twitter			Keybase
female	1967	high school graduate	yes	no			United States	no
female	1984	bachelor's degree	no	no			United States	yes	23andMe									was not relevant	1	2	to a large extent	yes	a few months ago but less than two years	I visited openSNP only for uploading data	no, I am not interested in uploading other data					no, I am not interested in creating phenotypes	no, I am not interested in contacting other users	no, I am not interested in meeting other users	no, not yet but probably in the future	I did not read them at all	no	no									yes, on Twitter				no
male	1986	doctorate (Ph.D.)	no		yes, as a professional		Canada	yes	23andMe									3	1	2	to a small extent	yes	a few months ago but less than two years	I visited openSNP only for uploading data		no, not yet but probably in the future				no, not yet but probably in the future	no, I am not interested in contacting other users	no, I am not interested in meeting other users	no, not yet but probably in the future	I only read them over quickly	no	no								yes, on Facebook	yes, on Twitter	yes, on Google+			no
male	1981	master's degree	no		yes, as a professional	yes, as a research participant	United States	yes	23andMe									3	1	2	not at all	yes	more than two years ago	I visited openSNP a few times since data upload			yes, phenotypes			yes	no, not yet but probably in the future	yes	no, not yet but probably in the future	I read them carefully	no				OpenHumans						yes, on Twitter
female	1979	high school graduate	no			yes, as a research participant	United States	yes	23andMe								Genes for Good	2	1	3	to a small extent	yes	a few months ago but less than two years	I visited openSNP a few times since data upload			yes, phenotypes			no, I am not interested in creating phenotypes	no, I am not interested in contacting other users	no, I am not interested in meeting other users	no, not yet but probably in the future	I only read them over quickly	no			Genomera		DNA.land					yes, on Twitter				no
male	1972	less than high school	no	no			Spain	yes	23andMe									1		3	to a moderate extent	yes								yes	yes, I have contacted only one person	no, not yet but probably in the future	no, not yet but probably in the future	I only read them over quickly	no							Gedmatch		yes, on Facebook					no
male	1969	doctorate (Ph.D.)	yes		yes, as a professional	yes, as a research participant	United States	yes	23andMe							dna.ancestry	FamilyTreeDNA	1	2	3	to a small extent	yes	a few months ago but less than two years	I visited openSNP a few times since data upload			yes, phenotypes	yes, ZIP code		no, not yet but probably in the future	no, not yet but probably in the future	no, not yet but probably in the future	no, not yet but probably in the future	I only read them over quickly	no		Personal Genome Project			DNA.land				yes, on Facebook	yes, on Twitter	yes, on Google+			no
female	1981	bachelor's degree	yes		yes, as a professional	yes, as a research participant	United States	yes	23andMe									2	3	1	not at all	yes	a few months ago but less than two years	I visit openSNP occasionally			yes, phenotypes			no, not yet but probably in the future	no, not yet but probably in the future	no, I am not interested in meeting other users	yes	I only read them over quickly	no		Personal Genome Project			DNA.land					yes, on Twitter	yes, on Google+	yes, on PatientsLikeMe	Instagram	no
male	1975	high school graduate	no	no			United States	yes	23andMe									3	1	2	to a large extent	yes	a few months ago but less than two years	I visited openSNP a few times since data upload		no, not yet but probably in the future				no, not yet but probably in the future	no, not yet but probably in the future	no, not yet but probably in the future	no, not yet but probably in the future	I read them carefully	no		Personal Genome Project							yes, on Facebook	yes, on Twitter	yes, on Google+			no
male	1991	master's degree	no		yes, as a professional		Russia	no
female	1985	doctorate (Ph.D.)	no	no			United Kingdom	yes	23andMe									was not relevant	1	was not relevant	not at all	no
female	1972	bachelor's degree	yes	no			Australia	yes	23andMe									2	1	3	to a large extent	no		I visited openSNP only for uploading data
female	1958	bachelor's degree	yes	no			Australia	yes
male	1962	bachelor's degree	no	no			Italy	yes	23andMe		deCODEme							1	2	3	to a small extent	yes	more than two years ago	I visited openSNP only for uploading data		no, not yet but probably in the future				no, not yet but probably in the future	no, not yet but probably in the future	no, I am not interested in meeting other users	yes	I did not read them at all	no					DNA.land				yes, on Facebook	yes, on Twitter	yes, on Google+			no
male	1971	high school graduate	yes			yes, as a research participant	United States	yes	23andMe									3	1	2	to a moderate extent	no
male	1947	doctorate (Ph.D.)	yes		yes, as a professional		Liechtenstein	yes	23andMe									was not relevant	1	2	to a small extent	yes	a few months ago but less than two years	I visited openSNP only for uploading data		no, not yet but probably in the future				no, not yet but probably in the future	no, not yet but probably in the future	no, I am not interested in meeting other users	no, not yet but probably in the future	I did not read them at all	no	no										yes, on Google+	yes, on PatientsLikeMe		no
male	1983	bachelor's degree	no	no			Australia	yes	23andMe									1	3	2	not at all	yes
male	1980	bachelor's degree	no	no			India	yes	23andMe									3	2	1	to a small extent	yes	more than two years ago	I visit openSNP occasionally			yes, phenotypes			no, not yet but probably in the future	no, I am not interested in contacting other users	no, I am not interested in meeting other users	no, not yet but probably in the future	I read them carefully	no						Your own personal website			yes, on Facebook	yes, on Twitter
male	1943	doctorate (Ph.D.)	yes			yes, as a research participant	Germany	yes	23andMe											1	to a large extent	yes	more than two years ago	I visit openSNP regularly		no, not yet but probably in the future				no, not yet but probably in the future	yes, I have contacted several people	yes	yes	I read them carefully	no	no							no						no
female	1955	master's degree	yes	no			United States	yes	23andMe							dna.ancestry	Ftdna	1	was not relevant	was not relevant	to a small extent	yes	more than two years ago	I visited openSNP a few times since data upload		no, not yet but probably in the future				no, I am not interested in creating phenotypes	no, not yet but probably in the future	no, not yet but probably in the future	no, I am not interested in downloading data to conduct analyses	I only read them over quickly	no					DNA.land				yes, on Facebook					no
male	1949	master's degree	yes	no		yes, as a research participant	United States	yes	23andMe									was not relevant	1	2	to a large extent	no
female	1953	master's degree	yes		yes, as a professional		United States	yes	23andMe									was not relevant	1	2	to a moderate extent	no
female	1952	master's degree	no	no			Australia	yes	23andMe									2	1	3	to a large extent	yes	a few months ago but less than two years	I visited openSNP a few times since data upload		no, not yet but probably in the future				no, I am not interested in creating phenotypes	no, not yet but probably in the future	no, I am not interested in meeting other users	no, I am not interested in downloading data to conduct analyses	I read them carefully	no		Personal Genome Project						no						no
male	1989	bachelor's degree	no	no			United States	yes	23andMe									2	1	3	to a moderate extent	yes	more than two years ago	I visit openSNP occasionally			yes, phenotypes			no, I am not interested in creating phenotypes	no, I am not interested in contacting other users	no, I am not interested in meeting other users	no, I am not interested in downloading data to conduct analyses	I only read them over quickly	no	no								yes, on Facebook		yes, on Google+			no
male	1983	bachelor's degree	yes	no			United States	yes	23andMe									was not relevant	1	was not relevant	to a large extent	no
female	1978	master's degree	no	no			United States	yes	23andMe									1		3	to a small extent	yes	a few months ago but less than two years	I visited openSNP only for uploading data		no, not yet but probably in the future				no, not yet but probably in the future	no, not yet but probably in the future	no, not yet but probably in the future	no, I am not interested in downloading data to conduct analyses	I only read them over quickly	no	no								yes, on Facebook		yes, on Google+			no
female	1960	doctorate (Ph.D.)	yes			yes, as a research participant	United States	yes	23andMe								Anonymous contribution at Vanderbilt.	2	1	3	to a moderate extent	no
male	1948	master's degree	no	no			United States	yes									Geno 2.0 National Geographic	3	2	1	not at all	no
female	1966	master's degree	yes	no			United States	yes	23andMe									2	1	was not relevant	not at all	yes	more than two years ago	I visited openSNP a few times since data upload	no, I am not interested in uploading other data					no, I am not interested in creating phenotypes	no, I am not interested in contacting other users	no, I am not interested in meeting other users	no, I am not interested in downloading data to conduct analyses	I did not read them at all	no			Genomera						yes, on Facebook	yes, on Twitter				no
female	1992	high school graduate	no	no			United States	yes	23andMe									1	2	3	to a small extent	yes	a few months ago but less than two years	I visited openSNP a few times since data upload		no, not yet but probably in the future				no, not yet but probably in the future	no, I am not interested in contacting other users	no, but I would definitely like to	no, I am not interested in downloading data to conduct analyses	I only read them over quickly	no	no								yes, on Facebook
female	1955	bachelor's degree	yes	no			United States	yes	23andMe									2	1	3	to a small extent	yes	more than two years ago	I visit openSNP occasionally		no, not yet but probably in the future				no, not yet but probably in the future	no, not yet but probably in the future	no, not yet but probably in the future	no, not yet but probably in the future	I only read them over quickly	no					DNA.land				yes, on Facebook					no
male	1949	bachelor's degree	no	no			United States	yes	23andMe									3	1	2	to a small extent	yes	a few months ago but less than two years	I visit openSNP occasionally	no, I am not interested in uploading other data					no, not yet but probably in the future	no, I am not interested in contacting other users	no, not yet but probably in the future	no, I am not interested in downloading data to conduct analyses	I read them carefully	no		Personal Genome Project							yes, on Facebook	yes, on Twitter	yes, on Google+			no
male	1984	doctorate (Ph.D.)	no		yes, as a professional	yes, as a research participant	United States	yes	23andMe									3	2	1	not at all	yes	more than two years ago	I visited openSNP a few times since data upload			yes, phenotypes			no, I am not interested in creating phenotypes	no, I am not interested in contacting other users	no, but I would definitely like to	no, not yet but probably in the future	I did not read them at all	no					DNA.land				yes, on Facebook	yes, on Twitter				no
female	1979	high school graduate	yes	no			United States	yes	23andMe									2	1	3	to a moderate extent	yes	a few months ago but less than two years	I visited openSNP only for uploading data	no, I am not interested in uploading other data					no, not yet but probably in the future	no, not yet but probably in the future	no, not yet but probably in the future	no, not yet but probably in the future	I only read them over quickly	no	no								yes, on Facebook	yes, on Twitter	yes, on Google+
female	1974	bachelor's degree	yes	no			United States	yes	23andMe								Genographic project	1	2	3	to a small extent	yes	a few weeks ago	I visited openSNP a few times since data upload		no, not yet but probably in the future				no, not yet but probably in the future	no, not yet but probably in the future	no, not yet but probably in the future	no, I am not interested in downloading data to conduct analyses	I only read them over quickly	no									yes, on Facebook	yes, on Twitter				no
female	1982	high school graduate	no		yes, as a professional		United States	yes	23andMe									was not relevant	1	2	to a small extent	yes	a few months ago but less than two years	I visited openSNP only for uploading data		no, not yet but probably in the future				no, not yet but probably in the future	no, I am not interested in contacting other users	no, I am not interested in meeting other users	no, I am not interested in downloading data to conduct analyses	I only read them over quickly	yes	no							no						no
female	1963	master's degree	yes	no			United States	no
female	1959	high school graduate	yes	no			United States	yes								dna.ancestry					not at all	yes	a few months ago but less than two years	I visited openSNP a few times since data upload			yes, phenotypes			no, not yet but probably in the future	no, not yet but probably in the future	no, but I would definitely like to	no, I am not interested in downloading data to conduct analyses	I only read them over quickly	no					DNA.land		GEDMatch		yes, on Facebook	yes, on Twitter	yes, on Google+			no
male	1984	bachelor's degree	no	no			United Kingdom	yes	23andMe									2	1	3	to a small extent	yes	a few months ago but less than two years	I visited openSNP a few times since data upload		no, not yet but probably in the future				no, not yet but probably in the future	no, not yet but probably in the future	no, but I would definitely like to	no, not yet but probably in the future	I read them carefully	no	no								yes, on Facebook		yes, on Google+			no
female	1974	bachelor's degree	no	no			United States	yes	23andMe									1	2	3	to a small extent	yes	a few months ago but less than two years	I visited openSNP a few times since data upload		no, not yet but probably in the future				no, not yet but probably in the future	no, not yet but probably in the future	no, not yet but probably in the future	no, I am not interested in downloading data to conduct analyses	I only read them over quickly	no					DNA.land				yes, on Facebook					no
male	1975	master's degree	no	no			Portugal	yes	23andMe									2	1	3	to a small extent	yes	a few months ago but less than two years	I visited openSNP a few times since data upload			yes, phenotypes			no, I am not interested in creating phenotypes	no, I am not interested in contacting other users	no, I am not interested in meeting other users	no, I am not interested in downloading data to conduct analyses	I only read them over quickly	no	no								yes, on Facebook					no
	1963	high school graduate	yes	no			United States	yes	23andMe									2	1	3	to a moderate extent	yes	more than two years ago	I visited openSNP only for uploading data		no, not yet but probably in the future				no, not yet but probably in the future	no, not yet but probably in the future		no, not yet but probably in the future	I only read them over quickly	no	no							no
male	1982	doctorate (Ph.D.)	yes		yes, as a professional	yes, as a research participant	Canada	yes	23andMe										1	2	to a small extent	yes	a few weeks ago	I visit openSNP occasionally			yes, phenotypes			yes	no, not yet but probably in the future	no, I am not interested in meeting other users	yes	I only read them over quickly	no					DNA.land				yes, on Facebook	yes, on Twitter
male	1980	master's degree	yes			yes, as a research participant	France	yes	23andMe								Y-Seq	2	1	was not relevant	to a small extent	yes	a few months ago but less than two years	I visited openSNP a few times since data upload			yes, phenotypes			no, I am not interested in creating phenotypes	no, I am not interested in contacting other users	no, I am not interested in meeting other users	no, I am not interested in downloading data to conduct analyses	I read them carefully	yes					DNA.land							yes, on PatientsLikeMe		no
female	1987	high school graduate	yes	no			United States	yes	23andMe									2	1	3	to a small extent	yes	more than two years ago	I visit openSNP regularly		no, not yet but probably in the future				no, not yet but probably in the future	yes, I have contacted several people	no, but I would definitely like to	no, not yet but probably in the future	I did not read them at all	no	no								yes, on Facebook	yes, on Twitter	yes, on Google+
male	1978	bachelor's degree	no	no			Australia	yes									FamilyDNA	2	1	3	to a moderate extent	yes	more than two years ago	I visited openSNP a few times since data upload		no, not yet but probably in the future				no, not yet but probably in the future	no, not yet but probably in the future	no, I am not interested in meeting other users	no, not yet but probably in the future	I read them carefully	no	no								yes, on Facebook	yes, on Twitter	yes, on Google+
male	1974	master's degree	yes		yes, as a professional		United States	yes	23andMe									1	2	was not relevant	not at all	yes	a few weeks ago	I visit openSNP occasionally			yes, phenotypes			no, not yet but probably in the future	no, I am not interested in contacting other users	no, I am not interested in meeting other users	yes	I only read them over quickly	no	no				DNA.land				yes, on Facebook	yes, on Twitter	yes, on Google+			no
male	1983	master's degree	no	no			United States	yes	23andMe									3	2	1	not at all	yes	a few months ago but less than two years	I visited openSNP only for uploading data			yes, phenotypes			yes	no, I am not interested in contacting other users	no, I am not interested in meeting other users	no, I am not interested in downloading data to conduct analyses	I read them carefully	no		Personal Genome Project						no						no
female		bachelor's degree	yes	no			United States	yes	23andMe									3	1	2	to a moderate extent	no
female	1965	bachelor's degree	yes	no			Canada	no
female	1988	bachelor's degree	no			yes, as a research participant	United States	yes
male	1954	master's degree	yes	no			United States	yes									National Geographic Genographic Project	2	3	1	not at all	yes	a few months ago but less than two years	I visited openSNP a few times since data upload		no, not yet but probably in the future				no, I am not interested in creating phenotypes	no, I am not interested in contacting other users	no, I am not interested in meeting other users	no, I am not interested in downloading data to conduct analyses	I only read them over quickly	no	no								yes, on Facebook				Livejournal	no
male	1982	bachelor's degree	no	no			Ukraine	yes									FTDNA	1	2	3	to a moderate extent	no
female	1974	bachelor's degree	no	no			United States	yes	23andMe									1	2	3	to a small extent	yes
female	1995	high school graduate	no	no			United States	yes	23andMe									3	1	2	to a small extent	yes	a few months ago but less than two years	I visited openSNP only for uploading data	no, I am not interested in uploading other data					no, I am not interested in creating phenotypes	no, I am not interested in contacting other users	no, I am not interested in meeting other users	no, not yet but probably in the future	I only read them over quickly	yes	no								yes, on Facebook	yes, on Twitter				no
female	1984	master's degree	yes	no			Singapore	yes	23andMe									1	2	was not relevant	to a large extent	yes	more than two years ago	I visited openSNP a few times since data upload	no, I am not interested in uploading other data					no, I am not interested in creating phenotypes	yes, I have contacted only one person	no, I am not interested in meeting other users	no, I am not interested in downloading data to conduct analyses	I only read them over quickly	yes	no							no						no
male	1989	bachelor's degree	no	no			United States	yes	23andMe									1	3	2	to a small extent	yes	more than two years ago	I visited openSNP a few times since data upload			yes, phenotypes			no, not yet but probably in the future	no, I am not interested in contacting other users	no, I am not interested in meeting other users	no, I am not interested in downloading data to conduct analyses	I did not read them at all	no								no
male	1974	high school graduate	yes	no			United States	yes								dna.ancestry		1	2	3	not at all	yes	more than two years ago	I visited openSNP a few times since data upload			yes, phenotypes			no, not yet but probably in the future	no, I am not interested in contacting other users	no, I am not interested in meeting other users	no, I am not interested in downloading data to conduct analyses	I only read them over quickly	no	no								yes, on Facebook	yes, on Twitter	yes, on Google+			no
male	1978	high school graduate	no	no			United Kingdom	yes	23andMe									3	1	2	to a small extent	yes	more than two years ago	I visit openSNP occasionally			yes, phenotypes			yes	no, not yet but probably in the future	no, not yet but probably in the future	no, not yet but probably in the future	I only read them over quickly	no	no							no						no
female	1965	bachelor's degree	no	no			United States	yes	23andMe							dna.ancestry		1	2	was not relevant	to a small extent	no
female	1967	high school graduate	yes			yes, as a research participant	United States	yes	23andMe					Pathway Genomics			Promethease, LiveWello, GeneKnot, Enlis Genomics, several others	3	2	1	to a large extent	yes	more than two years ago	I visit openSNP regularly			yes, phenotypes	yes, ZIP code	yes, profile picture	yes	no, not yet but probably in the future	no, not yet but probably in the future	yes	I only read them over quickly	no		Personal Genome Project			DNA.land		dnafit		yes, on Facebook	yes, on Twitter	yes, on Google+	yes, on PatientsLikeMe
female	1984	master's degree	no	no			United States	yes	23andMe							dna.ancestry		1	3	2	to a small extent	yes	a few months ago but less than two years	I visited openSNP only for uploading data		no, not yet but probably in the future				no, I am not interested in creating phenotypes	no, not yet but probably in the future	no, I am not interested in meeting other users	no, I am not interested in downloading data to conduct analyses	I only read them over quickly	no					DNA.land				yes, on Facebook	yes, on Twitter	yes, on Google+			no
male	1965	high school graduate	no	no			Belgium	yes	23andMe										1	2	to a large extent	yes	a few months ago but less than two years	I visit openSNP occasionally		no, not yet but probably in the future				no, I am not interested in creating phenotypes	no, not yet but probably in the future	no, but I would definitely like to	no, I am not interested in downloading data to conduct analyses	I only read them over quickly	no								no						no
male	1985	master's degree	no	no			Switzerland	no
male	2002	less than high school	no	no			Germany	yes	23andMe									was not relevant	was not relevant	was not relevant	to a moderate extent	yes	a few months ago but less than two years	I visited openSNP a few times since data upload			yes, phenotypes			no, not yet but probably in the future	no, not yet but probably in the future	no, I am not interested in meeting other users	no, not yet but probably in the future	I read them carefully	no					DNA.land				yes, on Facebook	yes, on Twitter	yes, on Google+
male	1969	bachelor's degree	no	no			United States	yes	23andMe										1	3	to a moderate extent	yes	a few months ago but less than two years	I visited openSNP only for uploading data		no, not yet but probably in the future				no, not yet but probably in the future	no, not yet but probably in the future	no, but I would definitely like to	no, not yet but probably in the future	I only read them over quickly	yes	no							no						no
female	1967	bachelor's degree	yes	no			United States	no
male	1948	bachelor's degree	no	no			United States	yes	23andMe									1	2	3	to a small extent	yes	more than two years ago	I visit openSNP occasionally			yes, phenotypes			no, not yet but probably in the future	yes, I have contacted only one person	no, but I would definitely like to		I read them carefully	no				OpenHumans			GEDmatch.com Wikitree.com		yes, on Facebook		yes, on Google+		I am considering deleting my Facebook account. I am present on some minor ones like pininterest and stumble upon	no
female	1989	high school graduate	no			yes, as a research participant	Canada	yes	23andMe									3	1	2	to a small extent	no
male	1959	bachelor's degree	yes	no			United States	yes	23andMe									2	3	1	not at all	yes	a few months ago but less than two years	I visited openSNP only for uploading data		no, not yet but probably in the future				no, I am not interested in creating phenotypes	no, I am not interested in contacting other users	no, I am not interested in meeting other users	no, not yet but probably in the future	I read them carefully	no	no							no						no
male	1962	high school graduate	yes	no			United Kingdom	yes								dna.ancestry		1	was not relevant	was not relevant	not at all	no
female	1974	bachelor's degree	yes			yes, as a research participant	United States	yes	23andMe							dna.ancestry		3	1	2	to a moderate extent	yes	a few months ago but less than two years	I visited openSNP a few times since data upload			yes, phenotypes	yes, ZIP code	yes, profile picture	no, I am not interested in creating phenotypes	no, not yet but probably in the future	no, I am not interested in meeting other users	yes	I only read them over quickly	yes		Personal Genome Project			DNA.land				yes, on Facebook	yes, on Twitter	yes, on Google+	yes, on PatientsLikeMe		no
female	1963	bachelor's degree	yes	no			United States	yes	23andMe							dna.ancestry		1	2	3	to a small extent	yes	a few months ago but less than two years	I visit openSNP occasionally		no, not yet but probably in the future					yes, I have contacted several people	no, not yet but probably in the future	no, not yet but probably in the future	I only read them over quickly	yes	no								yes, on Facebook					no
female	1973	high school graduate	no	no			Italy	yes	23andMe											1	to a moderate extent	yes	more than two years ago	I visit openSNP occasionally		no, not yet but probably in the future				no, not yet but probably in the future	no, not yet but probably in the future	no, I am not interested in meeting other users	no, I am not interested in downloading data to conduct analyses	I only read them over quickly	no					DNA.land				yes, on Facebook					no
male	1982	high school graduate	no				United States	yes	23andMe					Pathway Genomics			Full Genomes Corporation, Harvard Personal Genome Project	2	1	3	to a moderate extent	yes	more than two years ago	I visit openSNP occasionally			yes, phenotypes		yes, profile picture	no, not yet but probably in the future	no, not yet but probably in the future	no, not yet but probably in the future	no, not yet but probably in the future	I read them carefully	no		Personal Genome Project	Genomera	OpenHumans	DNA.land	Your own personal website			yes, on Facebook	yes, on Twitter	yes, on Google+	yes, on PatientsLikeMe	many, many others	no
male	1965	master's degree	yes		yes, as a professional		Germany	yes	23andMe									1	2	was not relevant	to a small extent	yes	a few months ago but less than two years	I visited openSNP a few times since data upload						no, I am not interested in creating phenotypes	yes, I have contacted only one person	no, not yet but probably in the future	no, not yet but probably in the future	I only read them over quickly	yes					DNA.land		prometease	no
male	1953	high school graduate	yes	no			United States	yes						Pathway Genomics		dna.ancestry	FTDNA	2	3	1	not at all	no
female	1973	bachelor's degree	yes	no			United States	yes	23andMe									2	1	was not relevant	to a large extent	yes	a few months ago but less than two years	I visited openSNP only for uploading data	no, I am not interested in uploading other data					no, I am not interested in creating phenotypes	no, I am not interested in contacting other users	no, I am not interested in meeting other users	no, I am not interested in downloading data to conduct analyses	I only read them over quickly	no	no								yes, on Facebook					no
female	1974	high school graduate	yes			yes, as a research participant	United States	yes	23andMe									1	2	was not relevant	not at all	yes	a few months ago but less than two years	I visited openSNP a few times since data upload		no, not yet but probably in the future				yes	no, not yet but probably in the future	no, not yet but probably in the future	no, not yet but probably in the future	I read them carefully	yes							GedMatch		yes, on Facebook	yes, on Twitter	yes, on Google+			no
female	1975	bachelor's degree	no	no			United States	yes								dna.ancestry		1	2	3	to a moderate extent	yes	a few weeks ago	I visited openSNP a few times since data upload		no, not yet but probably in the future				no, not yet but probably in the future	no, not yet but probably in the future	no, but I would definitely like to	no, not yet but probably in the future	I read them carefully	no							gedmatch.com		yes, on Facebook	yes, on Twitter	yes, on Google+			no
female	1989	less than high school	no		yes, as a professional		Canada	yes	23andMe									2	1	3	to a small extent	yes	more than two years ago	I visit openSNP regularly			yes, phenotypes		yes, profile picture	yes	no, I am not interested in contacting other users	yes	yes	I read them carefully	no			Genomera						yes, on Facebook	yes, on Twitter	yes, on Google+
male	1967	master's degree	yes	no			Canada	yes	23andMe									1	2	was not relevant	not at all	yes	a few months ago but less than two years	I visited openSNP a few times since data upload						no, I am not interested in creating phenotypes	no, not yet but probably in the future	no, I am not interested in meeting other users	no, I am not interested in downloading data to conduct analyses	I only read them over quickly	no					DNA.land		GEDMatch		yes, on Facebook	yes, on Twitter	yes, on Google+			no
female	1977	doctorate (Ph.D.)	no	no			United States	yes								dna.ancestry		1	was not relevant	was not relevant	not at all	no
female	1985	bachelor's degree	no	no			United States	yes	23andMe							dna.ancestry		1	2	3	to a small extent	yes	more than two years ago	I visited openSNP a few times since data upload		no, not yet but probably in the future				no, not yet but probably in the future	no, not yet but probably in the future	no, but I would definitely like to	no, not yet but probably in the future	I only read them over quickly	no								no						no
female	1958	bachelor's degree	yes				Canada	yes	23andMe									2	1	was not relevant	to a moderate extent	no
female	1992	bachelor's degree	no	no			United States	yes								dna.ancestry		1	2	3	not at all	yes	a few weeks ago	I visited openSNP a few times since data upload			yes, phenotypes			no, I am not interested in creating phenotypes	no, I am not interested in contacting other users	no, I am not interested in meeting other users	no, I am not interested in downloading data to conduct analyses	I read them carefully	no	no									yes, on Twitter				no
female	1947	bachelor's degree	yes	no			United States	yes									FTDNA	1	was not relevant	2	not at all	yes	a few months ago but less than two years	I visit openSNP occasionally			yes, phenotypes			yes	no, not yet but probably in the future	no, not yet but probably in the future	no, I am not interested in downloading data to conduct analyses	I only read them over quickly	no	no								yes, on Facebook	yes, on Twitter	yes, on Google+			no
female	1952	master's degree	no	no			United States	yes	23andMe									3	1	2	not at all	no
male	1946	bachelor's degree	no	no			United States	yes	23andMe									3	1	2	not at all	yes	a few months ago but less than two years	I visited openSNP only for uploading data			yes, phenotypes			yes	no, not yet but probably in the future	no, but I would definitely like to	no, I am not interested in downloading data to conduct analyses	I only read them over quickly	no	no								yes, on Facebook		yes, on Google+	yes, on PatientsLikeMe		no
male	1965	bachelor's degree	yes	no			Germany	yes	23andMe								FTDNA,DNATribes,YSEQ,YFull,Full Genomes Corporation,Prosapia Genetics	1	2	3	to a small extent	yes	a few weeks ago	I visit openSNP occasionally		no, not yet but probably in the future				no, I am not interested in creating phenotypes	no, I am not interested in contacting other users	no, I am not interested in meeting other users	no, not yet but probably in the future	I only read them over quickly	no					DNA.land				yes, on Facebook					no
male	1981	bachelor's degree	no	no			United States	yes	23andMe									1	2	3	to a small extent	yes	a few months ago but less than two years	I visited openSNP a few times since data upload	no, I am not interested in uploading other data					no, I am not interested in creating phenotypes	no, I am not interested in contacting other users	no, I am not interested in meeting other users	no, I am not interested in downloading data to conduct analyses	I read them carefully	no					DNA.land				yes, on Facebook	yes, on Twitter	yes, on Google+			no
male	1967	master's degree	no	no			United States	yes	23andMe									2	1	3	to a moderate extent	yes	a few months ago but less than two years	I visited openSNP a few times since data upload			yes, phenotypes	yes, ZIP code		yes	yes, I have contacted only one person	no, I am not interested in meeting other users	no, I am not interested in downloading data to conduct analyses	I only read them over quickly	no	no								yes, on Facebook	yes, on Twitter	yes, on Google+			no
female	1954	bachelor's degree	yes	no			United States	yes	23andMe							dna.ancestry	FamilyTreeDNA, GENO 1.0 and 2.0	1	2	3	to a moderate extent	yes	a few months ago but less than two years	I visited openSNP a few times since data upload		no, not yet but probably in the future				no, I am not interested in creating phenotypes	no, not yet but probably in the future	no, not yet but probably in the future	no, not yet but probably in the future	I only read them over quickly	no					DNA.land				yes, on Facebook	yes, on Twitter	yes, on Google+			no
male		doctorate (Ph.D.)	no		yes, as a professional		United States	yes	23andMe									was not relevant	was not relevant	was not relevant	not at all	yes	a few months ago but less than two years	I visited openSNP only for uploading data	no, I am not interested in uploading other data					no, not yet but probably in the future	yes, I have contacted only one person	no, I am not interested in meeting other users	no, not yet but probably in the future	I read them carefully	no	no								yes, on Facebook					no
male	1970	doctorate (Ph.D.)	no			yes, as a research participant	Colombia	yes					GeneleX					2		1	to a small extent	no
female	1983	master's degree	no	no			United States	yes								dna.ancestry	family tree DNA	1	2	was not relevant	to a small extent	yes	a few months ago but less than two years	I visited openSNP only for uploading data				yes, ZIP code		no, not yet but probably in the future	no, not yet but probably in the future	no, I am not interested in meeting other users	no, I am not interested in downloading data to conduct analyses	I read them carefully	no		Personal Genome Project								yes, on Twitter	yes, on Google+			no
male	1961	high school graduate	no	no			United States	yes	23andMe									1	2	3	to a small extent	yes	more than two years ago	I visited openSNP a few times since data upload		no, not yet but probably in the future				no, I am not interested in creating phenotypes	no, I am not interested in contacting other users	no, I am not interested in meeting other users	no, I am not interested in downloading data to conduct analyses	I only read them over quickly	no					DNA.land		Gedmatch	no						no
female	1955	bachelor's degree	yes	no			United States	yes	23andMe									was not relevant	1	was not relevant	to a moderate extent	no
male	1946	master's degree	yes	no			United States	yes	23andMe							dna.ancestry		1	2	was not relevant	not at all	yes	a few months ago but less than two years	I visited openSNP only for uploading data		no, not yet but probably in the future				no, not yet but probably in the future	no, not yet but probably in the future	no, but I would definitely like to	no, not yet but probably in the future	I only read them over quickly	yes	no								yes, on Facebook		yes, on Google+			no
male	1966	bachelor's degree	no	no			United States	yes									Family Tree DNA	1	3	2	not at all	yes	a few weeks ago	I visit openSNP occasionally		no, not yet but probably in the future				no, not yet but probably in the future	no, not yet but probably in the future	no, but I would definitely like to	no, not yet but probably in the future	I read them carefully	no					DNA.land		Gedmatch.com	no						no
female	1973	bachelor's degree	yes	no			United States	yes	23andMe							dna.ancestry		2	1	was not relevant	to a moderate extent	yes	a few months ago but less than two years	I visited openSNP only for uploading data		no, not yet but probably in the future				no, not yet but probably in the future	no, not yet but probably in the future	no, but I would definitely like to	no, not yet but probably in the future	I only read them over quickly	no		Personal Genome Project							yes, on Facebook					no
female	1949	bachelor's degree	no			yes, as a research participant	United States	yes	23andMe		deCODEme									2	to a small extent	yes	more than two years ago	I visited openSNP a few times since data upload			yes, phenotypes			yes	no, not yet but probably in the future	no, not yet but probably in the future	no, not yet but probably in the future	I read them carefully	no		Personal Genome Project						no						no
male	1978	doctorate (Ph.D.)	yes		yes, as a professional		Belgium	yes	23andMe									1	was not relevant	was not relevant	not at all	yes	a few months ago but less than two years	I visited openSNP only for uploading data		no, not yet but probably in the future				no, I am not interested in creating phenotypes	no, I am not interested in contacting other users	no, but I would definitely like to	no, not yet but probably in the future	I did not read them at all	no					DNA.land				yes, on Facebook	yes, on Twitter	yes, on Google+			no
female	1987	high school graduate	no	no			United States	yes	23andMe									2		3	to a small extent	yes	a few months ago but less than two years	I visited openSNP a few times since data upload			yes, phenotypes			no, not yet but probably in the future	no, I am not interested in contacting other users	no, I am not interested in meeting other users	no, not yet but probably in the future	I only read them over quickly	no	no							no						no
male	1953	master's degree	yes	no			United States	yes	23andMe							dna.ancestry	Family Tree DNA	1	was not relevant	2	not at all	yes	a few months ago but less than two years	I visited openSNP only for uploading data		no, not yet but probably in the future				no, not yet but probably in the future	no, not yet but probably in the future	no, not yet but probably in the future	no, not yet but probably in the future	I only read them over quickly	no	no								yes, on Facebook	yes, on Twitter	yes, on Google+			no
male	1957	bachelor's degree	no	no			Canada	yes									ftdna		was not relevant	1	not at all	no
female	1957	doctorate (Ph.D.)	yes		yes, as a professional	yes, as a research participant	United States	yes	23andMe								FamilyTree	3	1	2	to a moderate extent	yes	a few months ago but less than two years	I visited openSNP a few times since data upload			yes, phenotypes	yes, ZIP code		yes	no, not yet but probably in the future	no, but I would definitely like to	no, not yet but probably in the future	I read them carefully	no		Personal Genome Project		OpenHumans	DNA.land				yes, on Facebook	yes, on Twitter			Sermo, AgingCare, LinkedIn	no
female	1985	master's degree	no	no			United Kingdom	yes	23andMe									1	2	3	to a small extent	yes	a few months ago but less than two years	I visit openSNP occasionally		no, not yet but probably in the future				no, I am not interested in creating phenotypes	no, I am not interested in contacting other users	no, I am not interested in meeting other users	no, I am not interested in downloading data to conduct analyses	I only read them over quickly	no	no								yes, on Facebook		yes, on Google+			no
female	1989	bachelor's degree	no	no			Turkey	yes	23andMe								FTDNA	2	2	was not relevant	to a small extent	no
male	1946	high school graduate	yes	no			United Kingdom	yes	23andMe								FTDNA	1	3	2	not at all	yes	more than two years ago	I visit openSNP occasionally			yes, phenotypes			no, I am not interested in creating phenotypes	yes, I have contacted only one person	no, but I would definitely like to	no, not yet but probably in the future	I did not read them at all	no					DNA.land		Gedmatch, 23andMe, Ysearch, maybe others.		yes, on Facebook					no
male	1975	master's degree	yes	no			United States	yes									Ancestry.com	1	2	3	to a small extent	yes	a few weeks ago	I visited openSNP a few times since data upload			yes, phenotypes	yes, ZIP code	yes, profile picture	no, not yet but probably in the future	no, not yet but probably in the future	no, but I would definitely like to	yes	I read them carefully	no	no								yes, on Facebook	yes, on Twitter	yes, on Google+			no
male	1980	bachelor's degree	yes	no			United Kingdom	yes	23andMe									2	1	3	not at all	yes	a few months ago but less than two years	I visit openSNP occasionally		no, not yet but probably in the future				no, not yet but probably in the future	yes, I have contacted only one person	no, but I would definitely like to	no, not yet but probably in the future	I only read them over quickly	no		Personal Genome Project							yes, on Facebook				linkedin	no
male	1986	bachelor's degree	yes	no			United States	yes	23andMe									1	3	2	to a small extent	yes	a few months ago but less than two years	I visited openSNP a few times since data upload		no, not yet but probably in the future				no, not yet but probably in the future	no, I am not interested in contacting other users	no, I am not interested in meeting other users	no, I am not interested in downloading data to conduct analyses	I read them carefully	no	no								yes, on Facebook	yes, on Twitter	yes, on Google+			no
female	1964	high school graduate	no	no			United States	yes	23andMe									2	3	1	to a small extent	yes	a few months ago but less than two years	I visited openSNP only for uploading data	no, I am not interested in uploading other data					no, I am not interested in creating phenotypes	no, I am not interested in contacting other users	no, I am not interested in meeting other users	no, I am not interested in downloading data to conduct analyses	I only read them over quickly	yes		Personal Genome Project						no						no
male		doctorate (Ph.D.)	yes		yes, as a professional		Belgium	yes	23andMe											3	to a large extent	yes	a few months ago but less than two years	I visited openSNP a few times since data upload		no, not yet but probably in the future				no, not yet but probably in the future	no, not yet but probably in the future	no, but I would definitely like to	yes	I read them carefully	no					DNA.land				yes, on Facebook	yes, on Twitter	yes, on Google+
male	1975	doctorate (Ph.D.)	yes		yes, as a professional		Switzerland	yes	23andMe									2	1	3	to a small extent	yes	a few weeks ago	I visited openSNP only for uploading data		no, not yet but probably in the future				no, not yet but probably in the future	no, I am not interested in contacting other users	no, I am not interested in meeting other users	no, not yet but probably in the future	I read them carefully	yes	no									yes, on Twitter
male	1965	master's degree	yes	no			United States	yes									Family Tree DNA	1	2	3	not at all	no	a few months ago but less than two years	I visited openSNP only for uploading data		no, not yet but probably in the future				no, I am not interested in creating phenotypes	no, not yet but probably in the future	no, but I would definitely like to	no, I am not interested in downloading data to conduct analyses	I read them carefully	yes
male	1981	master's degree	yes	no			Czech Republic	yes	23andMe									1	3	2	to a small extent	yes	a few months ago but less than two years	I visited openSNP a few times since data upload	no, I am not interested in uploading other data					no, not yet but probably in the future	yes, I have contacted only one person	no, but I would definitely like to	no, not yet but probably in the future	I did not read them at all	yes					DNA.land				yes, on Facebook	yes, on Twitter	yes, on Google+			no
male	1980	high school graduate	no			yes, as a research participant	United States	yes	23andMe								FamilyTreeDNA, Veritas Genetics	3	1	2	to a small extent	yes	a few weeks ago	I visit openSNP occasionally			yes, phenotypes			no, not yet but probably in the future	yes, I have contacted only one person	no, not yet but probably in the future	no, not yet but probably in the future	I read them carefully	no		Personal Genome Project		OpenHumans			GEDMATCH			yes, on Twitter	yes, on Google+			no
female	1966	bachelor's degree	yes	no			United States	yes	23andMe									1	2	was not relevant	to a moderate extent	yes	a few months ago but less than two years	I visited openSNP only for uploading data		no, not yet but probably in the future				no, not yet but probably in the future	no, not yet but probably in the future	no, but I would definitely like to	yes	I did not read them at all	no	no							no						no
female	1971	master's degree	no	no			United States	yes	23andMe									3	1	2	to a large extent	yes	more than two years ago	I visited openSNP only for uploading data		no, not yet but probably in the future				no, not yet but probably in the future	no, not yet but probably in the future	no, but I would definitely like to	no, not yet but probably in the future	I only read them over quickly	no	no									yes, on Twitter	yes, on Google+			no
male	1989	doctorate (Ph.D.)	no	no			United States	yes	23andMe							dna.ancestry	FTDNA	1	2	3	to a moderate extent	no
female	1955	bachelor's degree	yes	no			United States	yes	23andMe							dna.ancestry				1	to a moderate extent	yes	a few months ago but less than two years	I visited openSNP a few times since data upload		no, not yet but probably in the future				no, not yet but probably in the future	yes, I have contacted several people	no, but I would definitely like to	no, not yet but probably in the future	I read them carefully	no	no								yes, on Facebook
male	1974	bachelor's degree	no	no			Luxembourg	yes	23andMe										1	2	to a moderate extent	yes
male	1988	high school graduate	no	no			United States	yes	23andMe									1	2	3	to a small extent	yes	more than two years ago	I visited openSNP a few times since data upload			yes, phenotypes	yes, ZIP code		no, I am not interested in creating phenotypes	no, I am not interested in contacting other users	no, I am not interested in meeting other users	no, I am not interested in downloading data to conduct analyses	I only read them over quickly	no		Personal Genome Project							yes, on Facebook	yes, on Twitter	yes, on Google+	yes, on PatientsLikeMe		no
male	1978	master's degree	yes	no			United States	yes									national geogtaphic's DNA study done ~10+ yrs ago	1	3	2	not at all	no
male	1965	master's degree	no	no			Canada	yes	23andMe								Ancestry.com, FTDNA, I also transferred my results to deCODEme	1	2	was not relevant	not at all	yes	more than two years ago	I visited openSNP a few times since data upload			yes, phenotypes			yes	no, I am not interested in contacting other users	no, I am not interested in meeting other users	no, I am not interested in downloading data to conduct analyses	I did not read them at all	no					DNA.land		GEDmatch and several others that I cannot even remember.		yes, on Facebook		yes, on Google+			no
male	1984	bachelor's degree	yes			yes, as a research participant	Brazil	yes	23andMe									2	1	was not relevant	to a large extent	yes	more than two years ago	I visited openSNP a few times since data upload		no, not yet but probably in the future				no, not yet but probably in the future	no, I am not interested in contacting other users	no, I am not interested in meeting other users	no, not yet but probably in the future	I did not read them at all	no	no								yes, on Facebook		yes, on Google+			no
male	1972	doctorate (Ph.D.)	no		yes, as a professional		Italy	no
male	1985	doctorate (Ph.D.)	no		yes, as a professional		United States	no
male	1958	bachelor's degree	yes	no			United States	yes								dna.ancestry	Family Tree DNA	1	3	2	not at all	yes	a few months ago but less than two years	I visit openSNP occasionally		no, not yet but probably in the future				no, not yet but probably in the future	no, not yet but probably in the future	no, but I would definitely like to	no, not yet but probably in the future	I only read them over quickly	no						Your own personal website	ancestry.com, Family Tree DNA, Wiki-Tree		yes, on Facebook					no
male	1970	bachelor's degree	yes	no			Norway	yes	23andMe									1	2	3	to a moderate extent	yes	a few months ago but less than two years	I visited openSNP a few times since data upload			yes, phenotypes			no, not yet but probably in the future	no, not yet but probably in the future	no, but I would definitely like to	no, not yet but probably in the future	I only read them over quickly	no	no								yes, on Facebook					no
male	1951	bachelor's degree	yes	no			United States	yes								dna.ancestry	genebase	1	2	3	not at all	yes	a few months ago but less than two years	I visit openSNP occasionally			yes, phenotypes	yes, ZIP code		no, not yet but probably in the future	yes, I have contacted several people	no, but I would definitely like to	yes	I only read them over quickly	no	no								yes, on Facebook
male	1958	bachelor's degree	yes	no			United States	yes								dna.ancestry	FTDNA	1	2	3	not at all	yes	a few months ago but less than two years	I visited openSNP a few times since data upload		no, not yet but probably in the future				no, not yet but probably in the future	no, not yet but probably in the future	no, but I would definitely like to	no, not yet but probably in the future	I only read them over quickly		no								yes, on Facebook	yes, on Twitter	yes, on Google+
female	1952	high school graduate	yes	no			United States	yes	23andMe									1	2	3	not at all	yes	a few months ago but less than two years	I visited openSNP a few times since data upload		no, not yet but probably in the future				no, not yet but probably in the future	no, not yet but probably in the future	no, not yet but probably in the future	no, I am not interested in downloading data to conduct analyses	I only read them over quickly	no					DNA.land				yes, on Facebook					no
female	1954	high school graduate	yes	no			United States	yes	23andMe								Ancestry.com	1	2	was not relevant	to a small extent	yes	a few months ago but less than two years	I visit openSNP occasionally		no, not yet but probably in the future				no, I am not interested in creating phenotypes	no, not yet but probably in the future	no, but I would definitely like to	no, I am not interested in downloading data to conduct analyses	I only read them over quickly	no							Gedmatch		yes, on Facebook					no
male	1965	bachelor's degree	yes	no			Hungary	yes	23andMe								FTDNA	1	was not relevant	2	to a small extent	yes
male	1945	high school graduate	yes	no			United Kingdom	yes	23andMe							dna.ancestry	Familytree		2	was not relevant	not at all	yes	a few months ago but less than two years	I visited openSNP only for uploading data		no, not yet but probably in the future				no, I am not interested in creating phenotypes	no, not yet but probably in the future	no, I am not interested in meeting other users	no, I am not interested in downloading data to conduct analyses	I did not read them at all	no					DNA.land				yes, on Facebook					no
female	1986	bachelor's degree	no	no			United States	yes	23andMe							dna.ancestry		3	2	1	to a small extent	yes	more than two years ago	I visited openSNP a few times since data upload	no, I am not interested in uploading other data					no, not yet but probably in the future	no, I am not interested in contacting other users	no, I am not interested in meeting other users	no, not yet but probably in the future	I only read them over quickly	no	no							no						no
male	1971	master's degree	yes	no			Afghanistan	yes	23andMe									1	2	3	to a small extent	yes	a few months ago but less than two years	I visited openSNP a few times since data upload			yes, phenotypes			no, not yet but probably in the future	no, not yet but probably in the future	no, but I would definitely like to	no, not yet but probably in the future	I only read them over quickly	no					DNA.land		Gedmatch.com		yes, on Facebook		yes, on Google+			no
female	1965	bachelor's degree	yes	no			United States	yes	23andMe								Ancestry.com DNA	2	1	3	to a moderate extent	yes	more than two years ago	I visited openSNP a few times since data upload			yes, phenotypes			no, I am not interested in creating phenotypes	no, I am not interested in contacting other users	no, not yet but probably in the future	no, I am not interested in downloading data to conduct analyses	I only read them over quickly	no									yes, on Facebook		yes, on Google+			no
male	1960	master's degree	no			yes, as a research participant	Sweden	yes
male	1972	bachelor's degree	yes		yes, as a professional	yes, as a research participant	United States	yes	23andMe									3	2	1	not at all	yes	more than two years ago	I visit openSNP occasionally		no, not yet but probably in the future				no, not yet but probably in the future	no, I am not interested in contacting other users	yes	no, I am not interested in downloading data to conduct analyses	I read them carefully	no		Personal Genome Project		OpenHumans	DNA.land	Your own personal website			yes, on Facebook	yes, on Twitter	yes, on Google+			no
male	1938	master's degree	yes	no			Canada	yes	23andMe								Family Tree DNA		3	1	not at all	yes	a few months ago but less than two years	I visited openSNP only for uploading data		no, not yet but probably in the future				no, not yet but probably in the future	no, not yet but probably in the future	no, not yet but probably in the future	no, not yet but probably in the future	I only read them over quickly	no	no								yes, on Facebook					no
male		master's degree	yes	no			United States	yes	23andMe									was not relevant	1	was not relevant	to a moderate extent	yes	more than two years ago	I visited openSNP a few times since data upload	no, I am not interested in uploading other data					no, I am not interested in creating phenotypes	no, I am not interested in contacting other users	no, I am not interested in meeting other users	no, I am not interested in downloading data to conduct analyses	I only read them over quickly	no			Genomera					no						no
male	1990	high school graduate	no	no			France	yes	23andMe									2	1	3	to a small extent	yes	a few months ago but less than two years	I visited openSNP a few times since data upload	no, I am not interested in uploading other data					no, I am not interested in creating phenotypes	no, I am not interested in contacting other users	no, I am not interested in meeting other users	no, I am not interested in downloading data to conduct analyses	I only read them over quickly	no	no							no						no
male	1981	master's degree	no	no			Russia	yes	23andMe									3	1	2	not at all	yes	more than two years ago	I visited openSNP only for uploading data			yes, phenotypes	yes, ZIP code	yes, profile picture	no, not yet but probably in the future	no, I am not interested in contacting other users	no, but I would definitely like to	no, I am not interested in downloading data to conduct analyses	I only read them over quickly	no	no								yes, on Facebook					no
male	1951	bachelor's degree	no	no			United States	yes									Illumina	was not relevant	1	was not relevant	to a small extent	no
male	1963	master's degree	yes	no			United States	yes	23andMe									1	2	was not relevant	not at all	yes	more than two years ago	I visited openSNP only for uploading data	no, I am not interested in uploading other data					no, I am not interested in creating phenotypes	no, I am not interested in contacting other users	no, but I would definitely like to	no, I am not interested in downloading data to conduct analyses	I only read them over quickly	no	no								yes, on Facebook					no
male	1978	doctorate (Ph.D.)	no		yes, as a professional	yes, as a research participant	United Kingdom	yes									Full Genomes	2	1	was not relevant	to a moderate extent	no
female	1984	bachelor's degree	no	no			Germany	yes	23andMe									3	1	2	to a small extent	yes	more than two years ago	I visit openSNP occasionally		no, not yet but probably in the future				no, not yet but probably in the future	no, I am not interested in contacting other users	no, I am not interested in meeting other users	no, I am not interested in downloading data to conduct analyses	I only read them over quickly	no	no									yes, on Twitter				no
male	1963	master's degree	yes	no			Portugal	no
male	1987	master's degree	no		yes, as a professional	yes, as a research participant	Canada	yes	23andMe									was not relevant	1	2	not at all	yes	a few months ago but less than two years	I visited openSNP a few times since data upload			yes, phenotypes			no, I am not interested in creating phenotypes	no, I am not interested in contacting other users	no, I am not interested in meeting other users	no, I am not interested in downloading data to conduct analyses	I did not read them at all	no					DNA.land				yes, on Facebook					no
male	1974	bachelor's degree	yes	no			Poland	yes	23andMe									3	2	1	not at all	yes	more than two years ago	I visited openSNP only for uploading data		no, not yet but probably in the future				no, I am not interested in creating phenotypes	yes, I have contacted only one person	no, I am not interested in meeting other users	yes	I only read them over quickly	no	no								yes, on Facebook	yes, on Twitter
female	1963	high school graduate	yes	no			Canada	yes	23andMe								FTDNA, AncestryDNA	1	2	3	to a small extent	yes	more than two years ago	I visit openSNP occasionally			yes, phenotypes			yes	no, not yet but probably in the future	no, but I would definitely like to	no, I am not interested in downloading data to conduct analyses	I only read them over quickly	no					DNA.land				yes, on Facebook	yes, on Twitter	yes, on Google+			no
male	1976	bachelor's degree	yes			yes, as a research participant	United States	yes	23andMe									2	1	3	to a moderate extent	no
male	1979	doctorate (Ph.D.)	no	no			United States	yes	23andMe									3	1	2	to a small extent	yes	a few months ago but less than two years	I visited openSNP a few times since data upload				yes, ZIP code		no, not yet but probably in the future	no, not yet but probably in the future	no, but I would definitely like to	no, not yet but probably in the future	I read them carefully	yes	no								yes, on Facebook	yes, on Twitter				no
male	1986	master's degree	yes	no	yes, as a professional		United States	no
female	1987	master's degree	yes			yes, as a research participant	Russia	yes									CNMT	was not relevant	2	1	to a small extent	no
male	1978	master's degree	no	no			United States	yes	23andMe							dna.ancestry		1	2	was not relevant	to a large extent	yes	a few months ago but less than two years	I visit openSNP occasionally			yes, phenotypes			no, I am not interested in creating phenotypes	no, not yet but probably in the future	no, but I would definitely like to	no, not yet but probably in the future	I only read them over quickly	no			Genomera										LinkedIn	no
male	1972	bachelor's degree	no	no			United States	yes	23andMe								Ancestry.com	1	2	3	to a moderate extent	yes	a few months ago but less than two years	I visited openSNP a few times since data upload			yes, phenotypes	yes, ZIP code		no, not yet but probably in the future	no, not yet but probably in the future	no, but I would definitely like to	no, not yet but probably in the future	I read them carefully	no			Genomera				GEDMatch.com, Promethease, FTDNA.com, Wikitree.com		yes, on Facebook		yes, on Google+			no
female	1986	bachelor's degree	no		yes, as a professional		United States	yes	23andMe							dna.ancestry	FTdna	1	2	3	to a small extent	yes
male	1933	high school graduate	yes	no			United States	yes	23andMe									1	2	3	to a small extent	yes
male	1982	bachelor's degree	no	no			United States	yes	23andMe									3	1	2	to a small extent	yes	more than two years ago	I visit openSNP occasionally		no, not yet but probably in the future				yes	no, not yet but probably in the future	no, I am not interested in meeting other users	yes	I read them carefully	no		Personal Genome Project		OpenHumans					yes, on Facebook	yes, on Twitter	yes, on Google+
female	1975	high school graduate	yes			yes, as a research participant	United States	yes	23andMe									1		3	to a small extent	yes	a few weeks ago	I visited openSNP a few times since data upload		no, not yet but probably in the future				no, not yet but probably in the future	no, not yet but probably in the future	no, but I would definitely like to	no, not yet but probably in the future	I did not read them at all	no	no						I would	no						no
male	1969	high school graduate	no	no			Guernsey (UK)	yes	23andMe								Promethease	3	1	2	to a moderate extent	yes	a few months ago but less than two years	I visited openSNP a few times since data upload		no, not yet but probably in the future				no, not yet but probably in the future	no, not yet but probably in the future	no, but I would definitely like to	no, I am not interested in downloading data to conduct analyses	I did not read them at all	no		Personal Genome Project		OpenHumans				no						no
female	1944	master's degree	yes	no			United States	yes	23andMe								National Geographic, Family Tree DNA, Ancestry DNA	2	3	1	not at all	yes	a few weeks ago	I visit openSNP regularly			yes, phenotypes		yes, profile picture	no, not yet but probably in the future	no, not yet but probably in the future	no, not yet but probably in the future	yes	I read them carefully	no					DNA.land				yes, on Facebook		yes, on Google+			no
female	1973	master's degree	no		yes, as a professional		Finland	yes	23andMe									3	1	2	to a small extent	yes	a few months ago but less than two years	I visit openSNP regularly		no, not yet but probably in the future				no, not yet but probably in the future	no, not yet but probably in the future	no, but I would definitely like to	yes	I only read them over quickly	no									yes, on Facebook					no
male	1979	master's degree	yes		yes, as a professional		United Kingdom	yes	23andMe									was not relevant	1	was not relevant	to a small extent	no
male	1957	less than high school	no	no			United Kingdom	yes	23andMe								Family tree dna	1	2	3	not at all	yes	a few months ago but less than two years	I visit openSNP occasionally			yes, phenotypes				no, not yet but probably in the future	no, not yet but probably in the future		I only read them over quickly	no					DNA.land				yes, on Facebook	yes, on Twitter				no
female	1959	high school graduate	yes	no			United States	yes	23andMe								ftDNA, DNATribes	1	3	2	to a large extent	yes	more than two years ago	I visited openSNP a few times since data upload		no, not yet but probably in the future				no, I am not interested in creating phenotypes	no, not yet but probably in the future	no, but I would definitely like to	no, I am not interested in downloading data to conduct analyses	I only read them over quickly	no		Personal Genome Project							yes, on Facebook					no
male	1968	doctorate (Ph.D.)	yes		yes, as a professional		United States	yes	23andMe									3	2	1	not at all	no
male	2001	less than high school	no	no			Canada	yes									Ftdna and Genographic Project	1	was not relevant	2	not at all	yes
male	1931	high school graduate	yes	no			United States	yes	23andMe							dna.ancestry		2	1	3	to a small extent	yes	a few months ago but less than two years	I visit openSNP occasionally		no, not yet but probably in the future				no, not yet but probably in the future	no, not yet but probably in the future	no, not yet but probably in the future	no, not yet but probably in the future	I only read them over quickly	no					DNA.land			no						no
female	1972	doctorate (Ph.D.)	no				United States	yes	23andMe									3	2	1	to a large extent	yes	a few months ago but less than two years	I visited openSNP only for uploading data		no, not yet but probably in the future				no, not yet but probably in the future	no, not yet but probably in the future	no, I am not interested in meeting other users	no, not yet but probably in the future	I only read them over quickly	no							nutrahacker, livewello, mthrf support, promethius		yes, on Facebook					no
male	1971	bachelor's degree	yes	no			United States	yes	23andMe									2	1	3	to a small extent	yes	more than two years ago	I visited openSNP a few times since data upload		no, not yet but probably in the future				no, not yet but probably in the future	no, not yet but probably in the future	no, not yet but probably in the future	yes	I only read them over quickly	no		Personal Genome Project							yes, on Facebook	yes, on Twitter	yes, on Google+			no
male	1946	master's degree	no	no		yes, as a research participant	United States	yes
female	1980	bachelor's degree	yes	no			United States	yes	23andMe									2	1	3	not at all	yes	a few weeks ago	I visit openSNP regularly		no, not yet but probably in the future				no, I am not interested in creating phenotypes	yes, I have contacted only one person	no, but I would definitely like to	no, I am not interested in downloading data to conduct analyses	I only read them over quickly	no	no									yes, on Twitter				no
male	1984	bachelor's degree	no			yes, as a research participant	United States	yes	23andMe									3	1	2	to a small extent	yes	more than two years ago	I visited openSNP a few times since data upload		no, not yet but probably in the future				no, not yet but probably in the future	no, not yet but probably in the future	no, but I would definitely like to	no, not yet but probably in the future	I only read them over quickly	no							SNPedia				yes, on Google+			no
female	1959	bachelor's degree	yes	no			United States	yes	23andMe									1	was not relevant	was not relevant	not at all	no
male	1977	bachelor's degree	no			yes, as a research participant	United States	yes	23andMe									3	1	2	to a moderate extent	yes	more than two years ago	I visit openSNP occasionally						no, not yet but probably in the future	no, not yet but probably in the future	no, but I would definitely like to	yes	I only read them over quickly	no									yes, on Facebook	yes, on Twitter	yes, on Google+			no
female	1972	bachelor's degree	no		yes, as a professional		United States	yes	23andMe								ftdna	1	3	2	to a moderate extent	yes	more than two years ago	I visited openSNP a few times since data upload		no, not yet but probably in the future				no, not yet but probably in the future	no, not yet but probably in the future	no, but I would definitely like to	no, I am not interested in downloading data to conduct analyses	I only read them over quickly	no	no								yes, on Facebook	yes, on Twitter	yes, on Google+			no
female	1951	bachelor's degree	yes		yes, as a professional		United States	yes	23andMe									2	1	3	not at all	yes	a few months ago but less than two years	I visited openSNP only for uploading data	no, I am not interested in uploading other data					no, not yet but probably in the future	no, not yet but probably in the future	no, not yet but probably in the future	no, I am not interested in downloading data to conduct analyses	I only read them over quickly	no	no								yes, on Facebook					no
male	1985	bachelor's degree	no			yes, as a research participant	United States	yes	23andMe		deCODEme						ftDNA, Personal Genome Project	3	1	2	to a small extent	yes	more than two years ago	I visit openSNP occasionally			yes, phenotypes	yes, ZIP code	yes, profile picture	no, not yet but probably in the future	no, not yet but probably in the future	no, not yet but probably in the future	no, not yet but probably in the future	I read them carefully	no		Personal Genome Project						no						no
male	1984	master's degree	no		yes, as a professional		Philippines	no
female	1968	high school graduate	yes			yes, as a research participant	United States	yes	23andMe								DNA tribes	1	3	2	to a small extent	yes	more than two years ago	I visited openSNP only for uploading data		no, not yet but probably in the future				no, not yet but probably in the future	no, not yet but probably in the future	no, I am not interested in meeting other users	no, not yet but probably in the future	I only read them over quickly	no		Personal Genome Project							yes, on Facebook					no
female	1983	bachelor's degree	no	no			United States	yes								dna.ancestry		1	2	3	to a small extent	yes	a few months ago but less than two years	I visited openSNP a few times since data upload			yes, phenotypes			no, not yet but probably in the future	no, not yet but probably in the future	no, but I would definitely like to	no, I am not interested in downloading data to conduct analyses	I read them carefully	yes									yes, on Facebook	yes, on Twitter	yes, on Google+			no
female	1966	doctorate (Ph.D.)	yes	no			United States	yes									familytree dna	1	was not relevant	was not relevant	not at all	yes	more than two years ago	I visit openSNP occasionally				yes, ZIP code		no, I am not interested in creating phenotypes	no, not yet but probably in the future	no, I am not interested in meeting other users	no, I am not interested in downloading data to conduct analyses	I only read them over quickly	no		Personal Genome Project							yes, on Facebook	yes, on Twitter	yes, on Google+			no
male	1974	high school graduate	no	no			United Kingdom	yes	23andMe									3	1	2	to a moderate extent	yes	a few months ago but less than two years	I visit openSNP occasionally			yes, phenotypes			no, not yet but probably in the future	no, not yet but probably in the future	no, but I would definitely like to		I only read them over quickly	no							mthfr.net	no						no
		bachelor's degree	no	no			United States	yes	23andMe									1	2	3	to a small extent	yes	a few months ago but less than two years	I visited openSNP a few times since data upload		no, not yet but probably in the future				no, not yet but probably in the future	no, not yet but probably in the future	no, but I would definitely like to	no, not yet but probably in the future	I only read them over quickly	no					DNA.land				yes, on Facebook					no
female	1978	doctorate (Ph.D.)	yes		yes, as a professional		United Kingdom	yes
male	1989	high school graduate	no	no			Denmark	no
female	1965	bachelor's degree	yes	no			United States	yes	23andMe							dna.ancestry		2	1	3	to a moderate extent	yes	more than two years ago	I visited openSNP a few times since data upload			yes, phenotypes			no, I am not interested in creating phenotypes	no, I am not interested in contacting other users	no, I am not interested in meeting other users	no, I am not interested in downloading data to conduct analyses	I only read them over quickly	no	no								yes, on Facebook					no
male	1946	master's degree	yes	no		yes, as a research participant	United States	yes	23andMe							dna.ancestry	FTDNA & National Geographic Project	1	3	2	to a small extent	yes	a few months ago but less than two years	I visit openSNP occasionally		no, not yet but probably in the future				no, not yet but probably in the future	no, not yet but probably in the future	no, not yet but probably in the future	no, not yet but probably in the future	I only read them over quickly	no		Personal Genome Project					GEDmatch		yes, on Facebook		yes, on Google+			no
male	1994	master's degree	no	no			France	yes	23andMe												not at all	no
male	1982	high school graduate	no	no			Russia	no
female	1956	high school graduate	yes	no			United States	no
female	1974	bachelor's degree	yes	no			United States	yes	23andMe								Amy Yasko (Doctors Data)	3	1	2	to a moderate extent	no
female	1989	high school graduate	no			yes, as a research participant	Canada	yes	23andMe									2	1	3	to a small extent	no
female	1955	bachelor's degree	yes			yes, as a research participant	Australia	yes	23andMe									2	1	3	to a small extent	no
female	1953	high school graduate	yes				United States	yes
male	1967	master's degree	no	no			United States	yes	23andMe									2	1	3	to a moderate extent	yes	a few months ago but less than two years	I visit openSNP occasionally			yes, phenotypes	yes, ZIP code		no, I am not interested in creating phenotypes	no, I am not interested in contacting other users	no, I am not interested in meeting other users	no, not yet but probably in the future	I only read them over quickly	no	no								yes, on Facebook	yes, on Twitter	yes, on Google+			no
male	1984	master's degree	yes	no			United States	yes	23andMe									3	2	1	not at all	yes	more than two years ago	I visited openSNP a few times since data upload			yes, phenotypes	yes, ZIP code		no, I am not interested in creating phenotypes	no, not yet but probably in the future	no, I am not interested in meeting other users	yes	I read them carefully	no		Personal Genome Project							yes, on Facebook		yes, on Google+
male	1984	bachelor's degree	no			yes, as a research participant	United States	yes	23andMe									1	3	2	not at all	yes	more than two years ago	I visited openSNP only for uploading data				yes, ZIP code		no, not yet but probably in the future	no, not yet but probably in the future	no, not yet but probably in the future	no, I am not interested in downloading data to conduct analyses	I read them carefully	yes	no									yes, on Twitter				no
female		master's degree	no	no			United States	yes	23andMe									2	1	3	to a moderate extent	no
male	1976	doctorate (Ph.D.)	yes	no			Switzerland	yes	23andMe									2	1	3	to a moderate extent	yes	a few months ago but less than two years	I visited openSNP a few times since data upload			yes, phenotypes			no, not yet but probably in the future	no, not yet but probably in the future	no, but I would definitely like to	no, I am not interested in downloading data to conduct analyses	I read them carefully	yes	no								yes, on Facebook	yes, on Twitter	yes, on Google+
male	2000	less than high school	no				Israel	no
male	1972	high school graduate	no	no			Germany	yes	23andMe									3	2	1	not at all	yes	more than two years ago	I visited openSNP only for uploading data		no, not yet but probably in the future				no, not yet but probably in the future	no, I am not interested in contacting other users	no, I am not interested in meeting other users	no, I am not interested in downloading data to conduct analyses	I only read them over quickly	no	no									yes, on Twitter				no
female	1945	bachelor's degree	yes	no			France	yes									FAmilytreedna	1	3	2	not at all	no
female	1986	bachelor's degree	no	no			United States	yes								dna.ancestry		1	2	3	not at all	no
male	1962	bachelor's degree	no	no			Italy	yes	23andMe		deCODEme						FTDNA		2	1	to a moderate extent	no
male	1971	master's degree	yes	no			Cambodia	yes	23andMe									1	2	3	to a moderate extent	yes	a few months ago but less than two years	I visited openSNP only for uploading data		no, not yet but probably in the future				no, not yet but probably in the future	no, not yet but probably in the future	no, I am not interested in meeting other users	no, I am not interested in downloading data to conduct analyses	I read them carefully	yes	no								yes, on Facebook		yes, on Google+
male	1967	bachelor's degree	yes	no			United States	yes	23andMe									1	3	2	not at all	yes	a few months ago but less than two years	I visited openSNP a few times since data upload				yes, ZIP code		no, I am not interested in creating phenotypes	no, I am not interested in contacting other users	no, I am not interested in meeting other users	no, I am not interested in downloading data to conduct analyses	I only read them over quickly	no	no								yes, on Facebook	yes, on Twitter	yes, on Google+			no
male		less than high school	yes	no			Australia	yes	23andMe								ftdna,genographic	1	2	3	to a moderate extent	yes	a few months ago but less than two years	I visit openSNP occasionally				yes, ZIP code		no, not yet but probably in the future	no, not yet but probably in the future	no, but I would definitely like to	no, not yet but probably in the future	I only read them over quickly	yes					DNA.land			no
male	1984	doctorate (Ph.D.)	no	no			United States	no
male	1984	doctorate (Ph.D.)	no		yes, as a professional		United States	yes	23andMe									3	2	1	not at all	yes	more than two years ago	I visited openSNP a few times since data upload			yes, phenotypes	yes, ZIP code	yes, profile picture	no, not yet but probably in the future	no, not yet but probably in the future	no, I am not interested in meeting other users	no, not yet but probably in the future	I did not read them at all	no					DNA.land				yes, on Facebook	yes, on Twitter				no
female	1980	master's degree	no	no			United States	yes	23andMe									1	3	2	to a moderate extent	yes	a few months ago but less than two years	I visit openSNP occasionally			yes, phenotypes			no, not yet but probably in the future	no, not yet but probably in the future	no, I am not interested in meeting other users	no, I am not interested in downloading data to conduct analyses	I read them carefully	no	no							no
male	1996	high school graduate	no	no			United States	yes	23andMe									1	was not relevant	was not relevant	not at all	yes	a few months ago but less than two years	I visited openSNP a few times since data upload			yes, phenotypes			no, not yet but probably in the future	yes, I have contacted only one person	no, but I would definitely like to	yes	I did not read them at all	no							GEDmatch.				yes, on Google+			no
male	1948	bachelor's degree	no	no			United States	yes	23andMe									was not relevant	was not relevant	was not relevant	to a small extent	yes	more than two years ago	I visit openSNP occasionally			yes, phenotypes			no, not yet but probably in the future	yes, I have contacted only one person	no, but I would definitely like to	no, not yet but probably in the future	I read them carefully	no							Gedmatch.com ;Wikitree		yes, on Facebook		yes, on Google+		I am trying to leave Face book. I have moribund profile on Orcut and some other minor site of which I have forgotten the title.	no
male	1972	bachelor's degree	yes	no			Australia	yes	23andMe									1	2	was not relevant	not at all	yes	a few months ago but less than two years	I visited openSNP a few times since data upload		no, not yet but probably in the future				no, not yet but probably in the future	no, I am not interested in contacting other users	no, I am not interested in meeting other users	no, I am not interested in downloading data to conduct analyses	I only read them over quickly	no	no								yes, on Facebook					no
female	1982	master's degree	no	no			United States	yes								dna.ancestry		1	2	3	to a small extent	yes	a few months ago but less than two years	I visit openSNP regularly			yes, phenotypes			no, I am not interested in creating phenotypes	no, I am not interested in contacting other users	no, but I would definitely like to	no, not yet but probably in the future	I only read them over quickly	no	no								yes, on Facebook	yes, on Twitter	yes, on Google+			no
female	1989	bachelor's degree	no			yes, as a research participant	Australia	yes	23andMe									2	1	3	to a small extent	yes	a few months ago but less than two years	I visited openSNP only for uploading data			yes, phenotypes			no, I am not interested in creating phenotypes	no, I am not interested in contacting other users	no, not yet but probably in the future	no, I am not interested in downloading data to conduct analyses	I only read them over quickly	no							Yes, I have shared it in other networks. As far as I am concerned - now its online its out there - it has potential to do others good.						Yes, I used to. In more recent times though I have changed a few privacy settings here and there to protect my friends/family/those close to me.	no
male	1962	high school graduate	yes			yes, as a research participant	United Kingdom	yes								dna.ancestry		1	was not relevant	2	not at all	no	more than two years ago	I visited openSNP only for uploading data		no, not yet but probably in the future
female	1979	master's degree	no		yes, as a professional	yes, as a research participant	United States	yes	23andMe									1	2	3	to a small extent	yes	a few months ago but less than two years	I visited openSNP a few times since data upload			yes, phenotypes			no, I am not interested in creating phenotypes	no, I am not interested in contacting other users	no, I am not interested in meeting other users	no, I am not interested in downloading data to conduct analyses	I only read them over quickly	no		Personal Genome Project							yes, on Facebook					no
male	1980	master's degree	no			yes, as a research participant	Italy	yes	23andMe									3	1	2	to a moderate extent	yes	a few weeks ago	I visit openSNP occasionally		no, not yet but probably in the future				no, not yet but probably in the future	no, not yet but probably in the future	no, I am not interested in meeting other users	yes	I only read them over quickly	yes	no								yes, on Facebook	yes, on Twitter	yes, on Google+			no
male	1992	bachelor's degree	no	no			United States	yes	23andMe									was not relevant	2	1	to a small extent	yes	a few months ago but less than two years	I visit openSNP occasionally	no, I am not interested in uploading other data					no, not yet but probably in the future	no, I am not interested in contacting other users	no, I am not interested in meeting other users	no, I am not interested in downloading data to conduct analyses	I did not read them at all	no	no								yes, on Facebook					no
male	1990	high school graduate	no			yes, as a research participant	France	yes
male	1953	bachelor's degree	no	no			United States	yes	23andMe								Genes for Good	2	1	3	to a small extent	yes	a few months ago but less than two years				yes, phenotypes			no, not yet but probably in the future	no, not yet but probably in the future	no, not yet but probably in the future	no, I am not interested in downloading data to conduct analyses	I only read them over quickly	no							GEDMatch.com		yes, on Facebook		yes, on Google+			no
male	1990	master's degree	no		yes, as a professional		Austria	yes	23andMe									2	1	3	not at all	yes	a few months ago but less than two years	I visited openSNP a few times since data upload			yes, phenotypes			yes	no, I am not interested in contacting other users	no, I am not interested in meeting other users	no, I am not interested in downloading data to conduct analyses	I only read them over quickly	no					DNA.land				yes, on Facebook	yes, on Twitter	yes, on Google+			no
female	1992	bachelor's degree	no	no			United States	no
male	1957	bachelor's degree	no			yes, as a research participant	Canada	yes									ftdna		2	1	not at all	yes	more than two years ago	I visited openSNP only for uploading data		no, not yet but probably in the future				no, not yet but probably in the future	no, not yet but probably in the future	no, not yet but probably in the future	no, not yet but probably in the future	I only read them over quickly	no							dna.ancestry ysearch wikifree ged	no						no
female	1964	bachelor's degree	yes	no			United States	yes	23andMe									1	2	3	to a small extent	yes	a few months ago but less than two years	I visited openSNP only for uploading data		no, not yet but probably in the future				no, I am not interested in creating phenotypes	no, I am not interested in contacting other users	no, I am not interested in meeting other users	no, I am not interested in downloading data to conduct analyses	I only read them over quickly	no	no								yes, on Facebook	yes, on Twitter	yes, on Google+			no
female	1970	high school graduate	yes	no			United States	yes	23andMe									2	1	3	to a small extent	yes	more than two years ago	I visited openSNP a few times since data upload		no, not yet but probably in the future				no, not yet but probably in the future	no, I am not interested in contacting other users	no, I am not interested in meeting other users	yes	I read them carefully	no	no							no						no
male	1969	bachelor's degree	no	no			Guernsey (UK)	yes	23andMe									3	1	2	to a large extent	yes	a few months ago but less than two years	I visited openSNP a few times since data upload		no, not yet but probably in the future				no, not yet but probably in the future	no, not yet but probably in the future	no, but I would definitely like to	no, not yet but probably in the future	I only read them over quickly	no		Personal Genome Project							yes, on Facebook	yes, on Twitter	yes, on Google+			no
female	1989	bachelor's degree	no	no			United States	yes	23andMe									3	1	2	to a large extent	yes	a few months ago but less than two years	I visited openSNP a few times since data upload		no, not yet but probably in the future				no, I am not interested in creating phenotypes	no, I am not interested in contacting other users	no, I am not interested in meeting other users	no, I am not interested in downloading data to conduct analyses	I read them carefully	no		Personal Genome Project			DNA.land			no						no
female	1985	master's degree	no	no			United States	yes	23andMe									2	3	1	not at all	yes	a few months ago but less than two years	I visited openSNP only for uploading data						no, not yet but probably in the future	no, not yet but probably in the future	no, not yet but probably in the future	no, I am not interested in downloading data to conduct analyses	I only read them over quickly	no		Personal Genome Project							yes, on Facebook		yes, on Google+			no
male	1973	bachelor's degree	yes	no			United States	yes	23andMe									2	1	3	not at all	yes	a few months ago but less than two years	I visited openSNP a few times since data upload	no, I am not interested in uploading other data					no, I am not interested in creating phenotypes	no, I am not interested in contacting other users	no, I am not interested in meeting other users			no	no							no						no
male	1989	bachelor's degree	no	no			Singapore	yes	23andMe									2	1	3	to a small extent	yes	a few months ago but less than two years	I visited openSNP only for uploading data		no, not yet but probably in the future				no, not yet but probably in the future	no, not yet but probably in the future	no, I am not interested in meeting other users	no, not yet but probably in the future	I did not read them at all	yes	no								yes, on Facebook					no
female	1967	high school graduate	yes	no			United States	yes	23andMe									1	2	3	to a small extent	yes	a few months ago but less than two years	I visited openSNP only for uploading data		no, not yet but probably in the future				no, not yet but probably in the future	no, not yet but probably in the future	no, not yet but probably in the future	no, not yet but probably in the future	I read them carefully	no		Personal Genome Project						no
female	1956	master's degree	yes	no			United States	yes	23andMe									3	1	2	to a large extent	yes	more than two years ago	I visited openSNP a few times since data upload			yes, phenotypes			no, I am not interested in creating phenotypes	no, not yet but probably in the future	no, but I would definitely like to	no, I am not interested in downloading data to conduct analyses	I only read them over quickly	yes	no								yes, on Facebook	yes, on Twitter	yes, on Google+	yes, on PatientsLikeMe		no
female	1945	master's degree	no	no			United States	yes	23andMe									1	3	2	not at all	no
female	1945	bachelor's degree	yes	no			United States	yes	23andMe							dna.ancestry	National Geographic				to a small extent	no
female	1975	high school graduate	yes	no			United States	yes	23andMe											1	to a small extent	no
female	1988	bachelor's degree	no	no			United States	yes								dna.ancestry		1	2	3	to a small extent	yes	a few months ago but less than two years	I visited openSNP a few times since data upload			yes, phenotypes	yes, ZIP code	yes, profile picture	no, not yet but probably in the future	no, I am not interested in contacting other users	no, I am not interested in meeting other users	no, I am not interested in downloading data to conduct analyses	I only read them over quickly	no	no								yes, on Facebook	yes, on Twitter	yes, on Google+			no
female	1960	high school graduate	no			yes, as a research participant	United States	yes	23andMe									1	2	3	to a large extent	yes	more than two years ago	I visit openSNP occasionally			yes, phenotypes			no, not yet but probably in the future	yes, I have contacted several people	no, not yet but probably in the future	no, not yet but probably in the future	I read them carefully	no		Personal Genome Project						no						no
male	1995	high school graduate	no	no				yes
male	1987	high school graduate	yes	no				yes								dna.ancestry		1	2	3	to a moderate extent	yes	a few months ago but less than two years	I visited openSNP a few times since data upload				yes, ZIP code		no, not yet but probably in the future	no, I am not interested in contacting other users	no, I am not interested in meeting other users	no, I am not interested in downloading data to conduct analyses	I only read them over quickly	no						Your own personal website			yes, on Facebook					no
female	1971	master's degree	no	no			United States	no
female	1976	high school graduate	yes			yes, as a research participant	United States	yes									Family Tree DNA	1	2	3	to a small extent	yes	a few months ago but less than two years	I visited openSNP a few times since data upload			yes, phenotypes	yes, ZIP code		no, not yet but probably in the future	no, I am not interested in contacting other users	no, not yet but probably in the future	no, not yet but probably in the future	I only read them over quickly	no					DNA.land				yes, on Facebook					no
female	1940	master's degree	yes			yes, as a research participant	United States	yes	23andMe									was not relevant	1	2	to a large extent	yes	more than two years ago	I visited openSNP a few times since data upload		no, not yet but probably in the future				no, not yet but probably in the future	no, I am not interested in contacting other users	no, I am not interested in meeting other users	no, I am not interested in downloading data to conduct analyses	I only read them over quickly	no	no								yes, on Facebook					no
female		bachelor's degree	yes	no			United States	yes	23andMe									1	2	was not relevant	to a moderate extent	yes	a few months ago but less than two years	I visited openSNP a few times since data upload		no, not yet but probably in the future				no, not yet but probably in the future	yes, I have contacted only one person	no, but I would definitely like to	no, not yet but probably in the future	I read them carefully	no								no						no
female	1966	high school graduate	yes	no			United States	no
male	1962	less than high school	yes	no			United States	yes									ancestry.com ftdna		2	1	to a small extent	no
male	1960	master's degree	no	no			United States	yes								dna.ancestry	Ftdna yfull	2	3	1	not at all	yes	a few months ago but less than two years	I visited openSNP a few times since data upload			yes, phenotypes			yes	no, not yet but probably in the future	no, but I would definitely like to	no, I am not interested in downloading data to conduct analyses	I read them carefully	no							Gedcom.net		yes, on Facebook	yes, on Twitter	yes, on Google+			no
male	1983	master's degree	no				Ireland	no
male	1964	doctorate (Ph.D.)	yes	no			United States	yes	23andMe									was not relevant	1	was not relevant	not at all	yes	a few months ago but less than two years	I visit openSNP occasionally		no, not yet but probably in the future				no, not yet but probably in the future	no, not yet but probably in the future	no, not yet but probably in the future	no, not yet but probably in the future	I only read them over quickly	no	no								yes, on Facebook					no
female	1989	master's degree	no	no			United States	no
male	1961	bachelor's degree	yes	no			United States	yes	23andMe									1	2	3	not at all	no
female	1946	master's degree	no	no			New Zealand	yes									National Genographic	1	2	3	to a moderate extent	yes	more than two years ago	I visited openSNP only for uploading data	no, I am not interested in uploading other data					no, I am not interested in creating phenotypes	no, not yet but probably in the future	no, but I would definitely like to	no, I am not interested in downloading data to conduct analyses	I read them carefully	no						Your own personal website	FamilyTreeDNA		yes, on Facebook		yes, on Google+			no
male		high school graduate	yes	no			United States	yes	23andMe							dna.ancestry		1	was not relevant	2	not at all	yes
male	1964	bachelor's degree	yes	no			United States	no
female	1953	doctorate (Ph.D.)	yes		yes, as a professional		United States	yes	23andMe									2	1	3	to a small extent	yes	a few months ago but less than two years	I visited openSNP a few times since data upload			yes, phenotypes			no, not yet but probably in the future	no, I am not interested in contacting other users	no, not yet but probably in the future	no, I am not interested in downloading data to conduct analyses	I only read them over quickly	no							Yes, but none of the above.		yes, on Facebook	yes, on Twitter	yes, on Google+		Linked in	no
female	1970	master's degree	no	no			United States	yes	23andMe										2	3	not at all	yes	a few months ago but less than two years	I visit openSNP occasionally		no, not yet but probably in the future				no, not yet but probably in the future	no, not yet but probably in the future	no, not yet but probably in the future	no, not yet but probably in the future	I read them carefully	no	no							no						no
female	1988	bachelor's degree	no	no			United States	yes	23andMe									2	1	was not relevant	to a small extent	yes	a few months ago but less than two years	I visited openSNP only for uploading data	no, I am not interested in uploading other data					no, not yet but probably in the future	no, I am not interested in contacting other users	no, I am not interested in meeting other users	no, not yet but probably in the future	I only read them over quickly	no	no								yes, on Facebook					no
male	1965	master's degree	yes	no			Germany	yes									FTDNA	1	was not relevant	was not relevant	not at all	no
male	1992	bachelor's degree	no			yes, as a research participant	Switzerland	yes	23andMe									2	1	3	to a small extent	yes	a few months ago but less than two years	I visited openSNP a few times since data upload		no, not yet but probably in the future				no, not yet but probably in the future	no, I am not interested in contacting other users	no, I am not interested in meeting other users	no, I am not interested in downloading data to conduct analyses	I read them carefully	no	no								yes, on Facebook	yes, on Twitter	yes, on Google+
male	1949	master's degree	yes			yes, as a research participant	United States	yes	23andMe							dna.ancestry	Family Tree DNA, Full Genomes Corp., Genes for Good, Sorenson Molecular Genealogy Foundation, Genographic Project, Britain's DNA, YSeq	1	3	2	to a small extent	yes	more than two years ago	I visited openSNP a few times since data upload						no, I am not interested in creating phenotypes	no, not yet but probably in the future	no, but I would definitely like to	no, not yet but probably in the future	I only read them over quickly	no		Personal Genome Project			DNA.land				yes, on Facebook	yes, on Twitter	yes, on Google+			no
female	1947	bachelor's degree	yes	no			United States	yes								dna.ancestry		1	was not relevant	was not relevant	not at all	yes	a few months ago but less than two years	I visited openSNP a few times since data upload						yes	no, not yet but probably in the future	no, but I would definitely like to	no, I am not interested in downloading data to conduct analyses	I only read them over quickly	no	no								yes, on Facebook		yes, on Google+			no
female	1978	master's degree	no	no			Turkey	yes									family tree DNA	2	3	1	not at all	yes	a few months ago but less than two years	I visited openSNP a few times since data upload		no, not yet but probably in the future				no, not yet but probably in the future	no, not yet but probably in the future	no, I am not interested in meeting other users	no, I am not interested in downloading data to conduct analyses	I only read them over quickly	no					DNA.land				yes, on Facebook	yes, on Twitter				no
male	1976	master's degree	no		yes, as a professional		United Kingdom	yes	23andMe									2	1	was not relevant	to a small extent	yes	more than two years ago	I visited openSNP a few times since data upload			yes, phenotypes		yes, profile picture	yes	no, not yet but probably in the future	no, but I would definitely like to	no, not yet but probably in the future	I only read them over quickly	no						Your own personal website			yes, on Facebook	yes, on Twitter	yes, on Google+			no
female	1958	high school graduate	yes	no			United States	no
male	1942	master's degree	yes	no			United States	yes	23andMe									was not relevant	1	2	to a moderate extent	yes	a few months ago but less than two years	I visited openSNP a few times since data upload		no, not yet but probably in the future				no, I am not interested in creating phenotypes	no, I am not interested in contacting other users	no, I am not interested in meeting other users	no, I am not interested in downloading data to conduct analyses	I read them carefully	no							I don't recall.		yes, on Facebook				Linked In	no
male	1952	high school graduate	yes	no			United States	yes	23andMe								national geographic	1	2	3	not at all	yes	a few months ago but less than two years	I visited openSNP a few times since data upload	no, I am not interested in uploading other data					no, I am not interested in creating phenotypes	no, I am not interested in contacting other users	no, not yet but probably in the future	no, I am not interested in downloading data to conduct analyses	I read them carefully	no	no							no						no
female	1969	master's degree	yes	no			Canada	yes	23andMe									1	2	3	to a large extent	yes	a few months ago but less than two years	I visit openSNP occasionally		no, not yet but probably in the future				no, not yet but probably in the future	no, not yet but probably in the future	no, I am not interested in meeting other users	no, not yet but probably in the future	I only read them over quickly	no							GEDCOM		yes, on Facebook	yes, on Twitter	yes, on Google+	yes, on PatientsLikeMe
male	1983	master's degree	no	no			United States	yes	23andMe									2	3	1	to a small extent	yes	a few months ago but less than two years	I visited openSNP only for uploading data	no, I am not interested in uploading other data					no, not yet but probably in the future	no, I am not interested in contacting other users	no, I am not interested in meeting other users		I read them carefully	no		Personal Genome Project					Same ZIP file from 23andme uploaded to PGP.	no						no
male	1942	high school graduate	yes	no			United States	yes	23andMe							dna.ancestry	FTDNA	3	2		to a small extent	yes	a few months ago but less than two years	I visited openSNP a few times since data upload		no, not yet but probably in the future				no, not yet but probably in the future	no, not yet but probably in the future	no, but I would definitely like to	no, not yet but probably in the future	I only read them over quickly	no							FTDNA, 23andMe, Ancestry		yes, on Facebook					no
female	1973	doctorate (Ph.D.)	no	no			United States	yes	23andMe								ancestry.com	1	3	2	not at all	yes	a few months ago but less than two years	I visited openSNP only for uploading data		no, not yet but probably in the future				no, I am not interested in creating phenotypes	no, not yet but probably in the future	no, but I would definitely like to	no, not yet but probably in the future	I only read them over quickly	no							gedmatch		yes, on Facebook					no
male	1984	bachelor's degree	no	no			Turkey	yes									Family Tree DNA	1	3	2	not at all	yes	a few weeks ago	I visited openSNP only for uploading data		no, not yet but probably in the future				no, not yet but probably in the future	no, not yet but probably in the future	no, but I would definitely like to	no, not yet but probably in the future	I did not read them at all	no					DNA.land		GEDmatch GenBank		yes, on Facebook					no
male	1967	high school graduate	no	no			United States	yes	23andMe							dna.ancestry	FTDNA	1	was not relevant	was not relevant	not at all	no
female	1973	bachelor's degree	yes	no			Puerto Rico	yes	23andMe									1	3	2	not at all	yes
female	1968	high school graduate	yes	no			United States	yes	23andMe							dna.ancestry	genetic genie, promethease	2	1	3	to a moderate extent	yes	more than two years ago	I visited openSNP a few times since data upload		no, not yet but probably in the future				no, not yet but probably in the future	no, not yet but probably in the future	no, I am not interested in meeting other users	yes	I only read them over quickly	no							genetic genie, promethease	no						no
female	1977	bachelor's degree	no	no			United States	yes	23andMe								Family Tree DNA	3	2	1	not at all	yes	a few months ago but less than two years	I visited openSNP only for uploading data	no, I am not interested in uploading other data					no, I am not interested in creating phenotypes	no, I am not interested in contacting other users	no, I am not interested in meeting other users	no, I am not interested in downloading data to conduct analyses	I only read them over quickly	no							Family Tree DNA / GenBank	no						no
male	1966	doctorate (Ph.D.)	yes	no			United States	yes	23andMe								BGI	2	1	was not relevant	to a moderate extent	yes
male	1961	doctorate (Ph.D.)	yes		yes, as a professional		Germany	yes	23andMe									2	1	3	to a small extent	no
male	1936	doctorate (Ph.D.)	yes	no			Canada	yes									FTDNA,YSEQ				not at all	no
male		bachelor's degree	no	no			Puerto Rico	yes	23andMe									1	2	3	not at all	yes
female	1973	bachelor's degree	yes	no			United States	yes	23andMe									2	1	3	to a large extent	no
male	1948	master's degree	yes	no			United States	yes								dna.ancestry	Family Tree DNA	1	was not relevant	2	not at all	yes	a few months ago but less than two years	I visited openSNP a few times since data upload		no, not yet but probably in the future				no, not yet but probably in the future	no, not yet but probably in the future	no, but I would definitely like to	no, not yet but probably in the future	I only read them over quickly	no					DNA.land		GedCom	no						no
male	1965	high school graduate	no	no			Belgium	yes	23andMe							dna.ancestry			1	3	to a large extent	no
female	1981	master's degree	no	no			United States	yes	23andMe									1	2	was not relevant	not at all	yes	a few months ago but less than two years	I visited openSNP only for uploading data	no, I am not interested in uploading other data					no, I am not interested in creating phenotypes	no, I am not interested in contacting other users	no, I am not interested in meeting other users	no, I am not interested in downloading data to conduct analyses	I did not read them at all	no	no								yes, on Facebook	yes, on Twitter	yes, on Google+			no
female	1973	high school graduate	no	no			Italy	yes	23andMe											1	to a small extent	yes	more than two years ago	I visited openSNP a few times since data upload		no, not yet but probably in the future				no, not yet but probably in the future		no, not yet but probably in the future	no, not yet but probably in the future	I only read them over quickly	no					DNA.land				yes, on Facebook	yes, on Twitter				no
female	1955	high school graduate	yes	no			New Zealand	yes	23andMe								national geographic	1	2	3	to a large extent	yes	more than two years ago	I visited openSNP a few times since data upload		no, not yet but probably in the future				no, not yet but probably in the future	yes, I have contacted several people	no, but I would definitely like to	no, I am not interested in downloading data to conduct analyses	I only read them over quickly	yes	no								yes, on Facebook				I have a facebook but dont use	no
male	1974	bachelor's degree	no	no			United States	yes	23andMe									2	1	3	to a moderate extent	yes
female	1988	master's degree	no	no			United States	yes								dna.ancestry		2	1	3	not at all	yes	a few months ago but less than two years	I visited openSNP only for uploading data		no, not yet but probably in the future				no, not yet but probably in the future	no, not yet but probably in the future	no, I am not interested in meeting other users	no, I am not interested in downloading data to conduct analyses	I only read them over quickly	no	no								yes, on Facebook	yes, on Twitter			Instagram	no
female	1976	high school graduate	no			yes, as a research participant	United States	yes	23andMe							dna.ancestry		1	2	3	to a moderate extent	yes	a few months ago but less than two years	I visit openSNP occasionally			yes, phenotypes	yes, ZIP code		yes	no, not yet but probably in the future	no, not yet but probably in the future	no, not yet but probably in the future	I only read them over quickly	no									yes, on Facebook					no
female	1991	bachelor's degree	no			yes, as a research participant	United States	yes	23andMe									1	3	2	not at all	yes	a few months ago but less than two years	I visited openSNP only for uploading data						no, I am not interested in creating phenotypes	no, I am not interested in contacting other users	no, I am not interested in meeting other users	no, not yet but probably in the future	I only read them over quickly	yes									yes, on Facebook
female	1985	master's degree	no	no			United States	yes	23andMe									2	1	3	to a small extent	yes
male	1961	master's degree	yes	no			United States	yes	23andMe							dna.ancestry	Genetree		1	was not relevant	to a small extent	yes	a few months ago but less than two years	I visited openSNP a few times since data upload	no, I am not interested in uploading other data					no, I am not interested in creating phenotypes	no, I am not interested in contacting other users	no, I am not interested in meeting other users	no, I am not interested in downloading data to conduct analyses	I only read them over quickly	yes							Livewello		yes, on Facebook		yes, on Google+			no
male	1982	bachelor's degree	no	no			United States	yes	23andMe		deCODEme							3	1	2	not at all	yes	a few months ago but less than two years	I visited openSNP only for uploading data		no, not yet but probably in the future				no, not yet but probably in the future	no, I am not interested in contacting other users	no, I am not interested in meeting other users	no, I am not interested in downloading data to conduct analyses	I did not read them at all	no	no								yes, on Facebook					no
male	1938	doctorate (Ph.D.)	no			yes, as a research participant	United States	yes	23andMe									2	1	3	to a small extent	no
male	1985	bachelor's degree	no		yes, as a professional		Canada	yes	23andMe									was not relevant	1	was not relevant	to a small extent	no
male	1948	bachelor's degree	yes	no			Brazil	yes									FTDNA	1	3	2	not at all	yes	a few months ago but less than two years	I visit openSNP occasionally			yes, phenotypes			yes	no, not yet but probably in the future	no, not yet but probably in the future	no, I am not interested in downloading data to conduct analyses	I only read them over quickly	no					DNA.land						yes, on Google+			no
female	1958	bachelor's degree	no	no			United States	yes	23andMe									2	1	3	to a small extent	yes	a few months ago but less than two years	I visited openSNP a few times since data upload			yes, phenotypes			no, not yet but probably in the future	no, not yet but probably in the future	no, not yet but probably in the future	no, not yet but probably in the future	I only read them over quickly	no							GEDMatch.com		yes, on Facebook	yes, on Twitter
male	1971	master's degree	no	no			Spain	yes	23andMe									3	1	2	to a moderate extent	yes	a few weeks ago	I visit openSNP occasionally			yes, phenotypes	yes, ZIP code	yes, profile picture	no, not yet but probably in the future	no, not yet but probably in the future	no, but I would definitely like to	no, not yet but probably in the future	I did not read them at all	no					DNA.land			no						no
male	1986	doctorate (Ph.D.)	no		yes, as a professional		United States	yes	23andMe									2	1	3	to a moderate extent	yes	more than two years ago	I visited openSNP a few times since data upload		no, not yet but probably in the future				no, I am not interested in creating phenotypes	no, I am not interested in contacting other users	no, but I would definitely like to	yes	I only read them over quickly	no					DNA.land	Your own personal website				yes, on Twitter	yes, on Google+			no
female	1963	bachelor's degree	no		yes, as a professional	yes, as a research participant	United States	yes	23andMe					Pathway Genomics				1	2	3	not at all	no
female	1977	bachelor's degree	yes	no			United States	yes	23andMe										1		to a large extent	yes	a few months ago but less than two years	I visited openSNP a few times since data upload		no, not yet but probably in the future				no, not yet but probably in the future	no, not yet but probably in the future	no, not yet but probably in the future	no, not yet but probably in the future	I read them carefully	no					DNA.land				yes, on Facebook
male	1983	high school graduate	no	no			United States	no
male	1956	bachelor's degree	yes	no			United States	yes	23andMe								FTDNA	1	was not relevant	was not relevant	not at all	yes	more than two years ago	I visit openSNP regularly		no, not yet but probably in the future				no, not yet but probably in the future	yes, I have contacted several people	no, but I would definitely like to	yes	I read them carefully	no									yes, on Facebook	yes, on Twitter				no
female	1983	high school graduate	yes	no				yes									ANCESTRY.COM	1	2	3	to a moderate extent	yes	a few months ago but less than two years	I visited openSNP a few times since data upload				yes, ZIP code		no, not yet but probably in the future	no, not yet but probably in the future	no, not yet but probably in the future	no, I am not interested in downloading data to conduct analyses	I did not read them at all	no		Personal Genome Project		OpenHumans			GEDMATCH, GENES FOR GOOD		yes, on Facebook				INSTAGRAM	no
female	1990	bachelor's degree	no	no			United States	yes	23andMe							dna.ancestry		1	2	3	to a moderate extent	yes	a few months ago but less than two years	I visited openSNP a few times since data upload			yes, phenotypes			no, not yet but probably in the future	no, I am not interested in contacting other users	no, I am not interested in meeting other users	no, not yet but probably in the future	I only read them over quickly	yes					DNA.land			no						no
female	1952	master's degree	no	no			United States	yes	23andMe									2	1	3	to a large extent	yes	a few months ago but less than two years	I visit openSNP occasionally	no, I am not interested in uploading other data					yes	no, not yet but probably in the future	no, I am not interested in meeting other users	no, not yet but probably in the future	I read them carefully	yes	no								yes, on Facebook					no
female	1982	high school graduate	no		yes, as a professional		United States	yes	23andMe									was not relevant	1	2	not at all	yes	a few months ago but less than two years	I visited openSNP a few times since data upload		no, not yet but probably in the future				yes	no, I am not interested in contacting other users	no, I am not interested in meeting other users	no, I am not interested in downloading data to conduct analyses	I only read them over quickly	yes	no							no						no
female	1953	bachelor's degree	no			yes, as a research participant	United States	yes	23andMe									3	2	1	to a small extent	yes	more than two years ago	I visited openSNP a few times since data upload			yes, phenotypes			no, not yet but probably in the future	no, not yet but probably in the future	no, not yet but probably in the future	no, I am not interested in downloading data to conduct analyses	I only read them over quickly	no							Promethease		yes, on Facebook			yes, on PatientsLikeMe		no
male	1983	doctorate (Ph.D.)	yes		yes, as a professional		Netherlands	yes	23andMe									1	3	2	not at all	yes	a few months ago but less than two years	I visited openSNP a few times since data upload			yes, phenotypes			no, not yet but probably in the future	no, not yet but probably in the future	no, but I would definitely like to	yes	I only read them over quickly	no	no									yes, on Twitter				no
male	1982	high school graduate	no	no			United States	yes	23andMe							dna.ancestry	Family Tree DNA, National Geographic's Genographic 2.0 NextGen	1	3	2	not at all	yes	a few months ago but less than two years	I visited openSNP a few times since data upload		no, not yet but probably in the future				yes	no, I am not interested in contacting other users	no, I am not interested in meeting other users	no, not yet but probably in the future	I only read them over quickly	no					DNA.land		Athletigen, Gedmatch	no						no
male	1973	bachelor's degree	no			yes, as a research participant	United States	yes	23andMe								My Wobble, DNA Doctor	2	1	3	to a small extent	yes	a few months ago but less than two years	I visited openSNP only for uploading data		no, not yet but probably in the future				no, not yet but probably in the future	no, not yet but probably in the future	no, not yet but probably in the future	no, I am not interested in downloading data to conduct analyses	I did not read them at all	no	no								yes, on Facebook					no
female	1944	high school graduate	no	no			Netherlands	yes	23andMe									1	2	3	not at all	yes	more than two years ago	I visited openSNP a few times since data upload		no, not yet but probably in the future				no, not yet but probably in the future	no, not yet but probably in the future	no, but I would definitely like to	no, I am not interested in downloading data to conduct analyses	I read them carefully	no					DNA.land		Gedmatch		yes, on Facebook
female	1971	bachelor's degree	no		yes, as a professional		Canada	yes	23andMe								GeneByGene, done my own PCR	1	2	3	to a small extent	yes	more than two years ago	I visited openSNP only for uploading data		no, not yet but probably in the future				no, not yet but probably in the future	no, not yet but probably in the future	no, not yet but probably in the future	no, not yet but probably in the future	I did not read them at all	no		Personal Genome Project							yes, on Facebook	yes, on Twitter	yes, on Google+
male	1997	less than high school	no	no			United States	yes								dna.ancestry		1	2	3	to a small extent	yes	a few months ago but less than two years	I visited openSNP a few times since data upload			yes, phenotypes			no, not yet but probably in the future	no, not yet but probably in the future	no, not yet but probably in the future	yes	I read them carefully	yes							Gedmatch		yes, on Facebook
male	1946	bachelor's degree	no	no			United States	yes	23andMe									3	2	1	not at all	yes	a few months ago but less than two years	I visited openSNP only for uploading data		no, not yet but probably in the future				no, not yet but probably in the future	no, not yet but probably in the future	no, not yet but probably in the future	no, I am not interested in downloading data to conduct analyses	I only read them over quickly	no	no								yes, on Facebook		yes, on Google+	yes, on PatientsLikeMe		no
male	1972	bachelor's degree	yes		yes, as a professional	yes, as a research participant	United States	yes	23andMe									3	2	1	not at all	yes	more than two years ago	I visited openSNP a few times since data upload		no, not yet but probably in the future				no, not yet but probably in the future	no, I am not interested in contacting other users	yes	no, I am not interested in downloading data to conduct analyses	I read them carefully	no		Personal Genome Project	Genomera	OpenHumans	DNA.land		Sage Bionetworks Synapse project https://www.synapse.org/#!Synapse:syn1418121/wiki/27459 (stub - will grow as studies that use genomics launch there)		yes, on Facebook	yes, on Twitter	yes, on Google+	yes, on PatientsLikeMe
male	1982	bachelor's degree	yes	no			United States	yes	23andMe									1	2	3	not at all	yes
female	1946	bachelor's degree	yes	no			United States	yes	23andMe									3	2	1	not at all	no
male	1990	bachelor's degree	no		yes, as a professional		United States	yes	23andMe									3	1	2	not at all	yes	a few months ago but less than two years	I visited openSNP a few times since data upload			yes, phenotypes			no, not yet but probably in the future	no, I am not interested in contacting other users	no, I am not interested in meeting other users	no, I am not interested in downloading data to conduct analyses	I read them carefully	no	no									yes, on Twitter				no
female	1986	bachelor's degree	no		yes, as a professional		United States	no
female	1959	bachelor's degree	yes	no			United States	yes	23andMe									3	1	2	not at all	yes	a few months ago but less than two years	I visited openSNP a few times since data upload						no, not yet but probably in the future			no, I am not interested in downloading data to conduct analyses	I read them carefully	no		Personal Genome Project							yes, on Facebook					no
male	1976	doctorate (Ph.D.)	yes		yes, as a professional		United States	yes	23andMe									1		3	to a moderate extent	yes	a few months ago but less than two years	I visited openSNP a few times since data upload	no, I am not interested in uploading other data					no, I am not interested in creating phenotypes	no, I am not interested in contacting other users	no, I am not interested in meeting other users	no, I am not interested in downloading data to conduct analyses	I did not read them at all	no		Personal Genome Project			DNA.land			no						no
female	1973	bachelor's degree	yes	no			United States	yes								dna.ancestry		1	2	was not relevant	not at all	no
male	1972	bachelor's degree	no	no			United States	yes	23andMe									2	1	3	to a small extent	yes	a few months ago but less than two years	I visited openSNP a few times since data upload			yes, phenotypes			no, I am not interested in creating phenotypes	no, not yet but probably in the future	no, not yet but probably in the future	no, I am not interested in downloading data to conduct analyses	I only read them over quickly	no						Your own personal website					yes, on Google+			no
male	1982	doctorate (Ph.D.)	no		yes, as a professional		United States	yes	23andMe								Personal Genome Project - Harvard	2	3	1	to a small extent	no
male	1954	bachelor's degree	yes	no			United States	yes	23andMe									2	1	3	to a moderate extent	yes	a few months ago but less than two years	I visited openSNP only for uploading data		no, not yet but probably in the future				no, not yet but probably in the future	no, not yet but probably in the future	no, but I would definitely like to	no, not yet but probably in the future	I only read them over quickly	no	no								yes, on Facebook					no
male	1984	bachelor's degree	no	no			United States	yes	23andMe								Gene By Gene	3	1	2	to a small extent	yes	a few months ago but less than two years	I visited openSNP only for uploading data						no, not yet but probably in the future	no, not yet but probably in the future	no, I am not interested in meeting other users	no, not yet but probably in the future	I did not read them at all	no							I don't, but I've thought about it and I'm certainly not opposed to it.		yes, on Facebook					no
female	1989	high school graduate	yes			yes, as a research participant	United States	yes								dna.ancestry	ftdna	1	2	3	to a small extent	yes	a few months ago but less than two years	I visited openSNP a few times since data upload		no, not yet but probably in the future				no, not yet but probably in the future	no, not yet but probably in the future	no, but I would definitely like to	no, not yet but probably in the future	I only read them over quickly	no					DNA.land				yes, on Facebook	yes, on Twitter				no
female	1967	master's degree	no	no			United States	yes	23andMe							dna.ancestry		1	2	3	to a small extent	yes	more than two years ago	I visited openSNP only for uploading data						no, not yet but probably in the future	no, not yet but probably in the future	no, but I would definitely like to	no, not yet but probably in the future	I only read them over quickly	no	no								yes, on Facebook					no
male	1961	high school graduate	no	no			United States	yes	23andMe									1	2	3	to a small extent	yes	more than two years ago	I visited openSNP a few times since data upload	no, I am not interested in uploading other data					no, I am not interested in creating phenotypes	no, I am not interested in contacting other users	no, I am not interested in meeting other users	no, not yet but probably in the future	I did not read them at all	no	no						no, but that doesn't mean I wouldn't if there was some interest in it	no						no
female	1959	bachelor's degree	yes	no			United States	yes	23andMe									1		2	to a small extent	yes	a few months ago but less than two years	I visited openSNP only for uploading data		no, not yet but probably in the future				no, not yet but probably in the future	no, not yet but probably in the future	no, I am not interested in meeting other users	no, not yet but probably in the future	I only read them over quickly	no	no								yes, on Facebook					no
male	1976	bachelor's degree	yes	no			United States	yes	23andMe									2	1	3	to a small extent	yes	more than two years ago	I visited openSNP only for uploading data		no, not yet but probably in the future				no, not yet but probably in the future	no, I am not interested in contacting other users	no, I am not interested in meeting other users	no, I am not interested in downloading data to conduct analyses	I only read them over quickly	yes	no									yes, on Twitter				no
male	1957	bachelor's degree	yes	no			United States	yes	23andMe										1	2	to a large extent	yes	a few months ago but less than two years	I visited openSNP only for uploading data		no, not yet but probably in the future				no, not yet but probably in the future	no, not yet but probably in the future	no, but I would definitely like to	no, I am not interested in downloading data to conduct analyses	I only read them over quickly	no	no								yes, on Facebook					no
male	1960	master's degree	yes	no			United States Virgin Islands (USA)	yes	23andMe									1	2	was not relevant	to a small extent	yes	a few months ago but less than two years	I visited openSNP a few times since data upload			yes, phenotypes	yes, ZIP code	yes, profile picture	yes	no, not yet but probably in the future	no, but I would definitely like to	no, I am not interested in downloading data to conduct analyses	I did not read them at all	no							not sure	no					Facebook is evil.	no
female	1957	high school graduate	yes	no			United States	yes	23andMe									2	1	3	to a large extent	yes	a few months ago but less than two years	I visited openSNP a few times since data upload		no, not yet but probably in the future				no, I am not interested in creating phenotypes	no, not yet but probably in the future	no, I am not interested in meeting other users	no, not yet but probably in the future	I only read them over quickly	no	no								yes, on Facebook					no
male	1964	doctorate (Ph.D.)	yes		yes, as a professional		United States	yes	23andMe									3	1	2	to a moderate extent	no
male	1984	bachelor's degree	no	no			United States	yes	23andMe									2	1	3	to a small extent	yes	a few months ago but less than two years	I visited openSNP only for uploading data		no, not yet but probably in the future				no, not yet but probably in the future	no, not yet but probably in the future	no, but I would definitely like to	no, I am not interested in downloading data to conduct analyses	I only read them over quickly	no	no								yes, on Facebook	yes, on Twitter	yes, on Google+			no
female	1985	high school graduate	no	no			Finland	yes	23andMe								Gedmatch, Family Tree DNA	1	3	2	to a small extent	yes	more than two years ago	I visit openSNP occasionally			yes, phenotypes			no, not yet but probably in the future	no, I am not interested in contacting other users	no, I am not interested in meeting other users	no, not yet but probably in the future	I only read them over quickly	no						Your own personal website			yes, on Facebook	yes, on Twitter	yes, on Google+	yes, on PatientsLikeMe		no
female	1963	master's degree	yes	no			United States	no
female	1941	bachelor's degree	yes	no			United States	yes	23andMe									1	3	2	not at all	no
female	1951	doctorate (Ph.D.)	yes	no			United States	yes	23andMe										1	3	to a small extent	no
female	1961	high school graduate	yes	no			United States	yes	23andMe									1	was not relevant	2	not at all	yes	a few months ago but less than two years	I visited openSNP a few times since data upload	no, I am not interested in uploading other data					no, I am not interested in creating phenotypes	no, I am not interested in contacting other users	no, I am not interested in meeting other users	no, I am not interested in downloading data to conduct analyses	I only read them over quickly	no					DNA.land		Gedmatch		yes, on Facebook					no
female	1969	bachelor's degree	yes	no			United States	yes	23andMe									2	1	3	not at all	yes	a few weeks ago	I visited openSNP only for uploading data		no, not yet but probably in the future		yes, ZIP code		no, not yet but probably in the future	no, not yet but probably in the future	no, not yet but probably in the future	no, I am not interested in downloading data to conduct analyses	I only read them over quickly	no	no								yes, on Facebook	yes, on Twitter				no
female	1969	bachelor's degree	yes	no			United States	yes	23andMe							dna.ancestry	National Geographic, and Family Tree DNA	1	2	3	not at all	no
male	1951	bachelor's degree	yes				United States	yes								dna.ancestry	genebase.com	1	2	3	to a small extent	yes	more than two years ago	I visit openSNP occasionally			yes, phenotypes	yes, ZIP code		no, not yet but probably in the future	no, not yet but probably in the future	no, but I would definitely like to	no, not yet but probably in the future	I only read them over quickly	yes	no								yes, on Facebook					no
female	1968	doctorate (Ph.D.)	yes	no			United States	no
male	1943	master's degree	yes	no			United States	yes	23andMe										1		to a small extent	yes	a few months ago but less than two years	I visited openSNP a few times since data upload			yes, phenotypes	yes, ZIP code		yes	no, I am not interested in contacting other users	no, I am not interested in meeting other users	no, I am not interested in downloading data to conduct analyses	I only read them over quickly	no									yes, on Facebook					no
female	1949	bachelor's degree	yes	no			Canada	yes	23andMe									was not relevant	1	2	to a small extent	yes	a few months ago but less than two years	I visited openSNP a few times since data upload		no, not yet but probably in the future				no, not yet but probably in the future	no, I am not interested in contacting other users	no, I am not interested in meeting other users	no, not yet but probably in the future	I did not read them at all	no	no								yes, on Facebook	yes, on Twitter				no
female	1964	bachelor's degree	yes	no			United States	yes	23andMe									2	1	3	to a large extent	yes	more than two years ago	I visit openSNP occasionally		no, not yet but probably in the future				no, not yet but probably in the future	no, not yet but probably in the future	no, but I would definitely like to	yes	I did not read them at all	no	no								yes, on Facebook					no
male	1985	doctorate (Ph.D.)	no			yes, as a research participant	Algeria	no
male	1990	master's degree	no	no			United States	yes	23andMe									1	2	3	not at all	yes	a few months ago but less than two years	I visited openSNP only for uploading data		no, not yet but probably in the future				no, not yet but probably in the future	no, not yet but probably in the future	no, not yet but probably in the future	no, not yet but probably in the future	I did not read them at all	no	no								yes, on Facebook	yes, on Twitter	yes, on Google+			no
male	1979	bachelor's degree	yes	no			United States	yes	23andMe								Ancestry, FTDNA,		2	1	to a large extent	yes	a few months ago but less than two years	I visited openSNP a few times since data upload			yes, phenotypes			no, I am not interested in creating phenotypes	no, not yet but probably in the future	no, not yet but probably in the future	no, I am not interested in downloading data to conduct analyses	I only read them over quickly	no					DNA.land				yes, on Facebook	yes, on Twitter	yes, on Google+			no
male	1981	bachelor's degree	no	no			United States	yes	23andMe									2	3	1	not at all	yes	more than two years ago	I visited openSNP only for uploading data			yes, phenotypes			no, not yet but probably in the future	no, not yet but probably in the future	no, I am not interested in meeting other users	no, not yet but probably in the future	I only read them over quickly	no		Personal Genome Project							yes, on Facebook	yes, on Twitter				no
male	1973	doctorate (Ph.D.)	no		yes, as a professional		United States	yes
male	1981	master's degree	no		yes, as a professional	yes, as a research participant	United States	yes	23andMe									2	1	3	to a small extent	yes	a few months ago but less than two years	I visited openSNP only for uploading data		no, not yet but probably in the future				no, not yet but probably in the future	no, not yet but probably in the future	no, I am not interested in meeting other users	no, not yet but probably in the future	I read them carefully	no	no								yes, on Facebook	yes, on Twitter	yes, on Google+			no
female	1982	bachelor's degree	no			yes, as a research participant	United States	yes	23andMe									3	1	2	to a moderate extent	yes	more than two years ago	I visit openSNP regularly			yes, phenotypes			no, not yet but probably in the future	no, not yet but probably in the future	no, not yet but probably in the future	no, not yet but probably in the future	I read them carefully	no		Personal Genome Project					More than I can remember.	no
female	1964	high school graduate	no	no			United States	yes	23andMe											3	to a small extent	no
female	1970	high school graduate	yes	no			United States	yes	23andMe							dna.ancestry		1	was not relevant	2	not at all	yes	a few months ago but less than two years	I visit openSNP occasionally		no, not yet but probably in the future				no, not yet but probably in the future	no, not yet but probably in the future	no, not yet but probably in the future	no, not yet but probably in the future	I read them carefully	no	no							no						no
female	1968	bachelor's degree	no	no			United States	yes	23andMe								FTDNA, ancestryDNA	1	2	3	to a small extent	yes	more than two years ago	I visited openSNP a few times since data upload	no, I am not interested in uploading other data					no, I am not interested in creating phenotypes	no, not yet but probably in the future	no, but I would definitely like to	no, I am not interested in downloading data to conduct analyses	I read them carefully	no	no								yes, on Facebook	yes, on Twitter	yes, on Google+			no
male	1959	doctorate (Ph.D.)	yes	no			France	yes	23andMe								FTDNA	3	2		to a small extent	yes
female	1972	bachelor's degree	yes	no			United Kingdom	yes	23andMe									1	2	3	to a moderate extent	yes	more than two years ago	I visited openSNP a few times since data upload			yes, phenotypes			no, not yet but probably in the future	no, I am not interested in contacting other users	no, I am not interested in meeting other users	no, I am not interested in downloading data to conduct analyses	I only read them over quickly	no			Genomera						yes, on Facebook					no
female	1978	master's degree	no	no			United States	yes	23andMe									1		3	to a small extent	yes	a few months ago but less than two years	I visited openSNP only for uploading data		no, not yet but probably in the future				no, not yet but probably in the future	no, not yet but probably in the future	no, not yet but probably in the future	no, I am not interested in downloading data to conduct analyses	I did not read them at all	no	no								yes, on Facebook		yes, on Google+			no
male		doctorate (Ph.D.)	yes		yes, as a professional	yes, as a research participant	Switzerland	yes	23andMe									3	2	1	to a small extent	yes	a few months ago but less than two years	I visited openSNP only for uploading data		no, not yet but probably in the future		yes, ZIP code		no, I am not interested in creating phenotypes	no, I am not interested in contacting other users	no, not yet but probably in the future	no, I am not interested in downloading data to conduct analyses	I only read them over quickly	no							On MIDATA.coop when this feature will be available			yes, on Twitter		yes, on PatientsLikeMe	LIinkedIn	no
female	1989	bachelor's degree	no				Germany	yes	23andMe									was not relevant	2	1	not at all	yes	a few months ago but less than two years	I visited openSNP a few times since data upload			yes, phenotypes			yes	no, not yet but probably in the future	no, I am not interested in meeting other users	no, I am not interested in downloading data to conduct analyses	I read them carefully	no	no							no
male								yes													to a large extent	yes
female	1961	bachelor's degree	no	no			United States	yes	23andMe									was not relevant	1	2	to a large extent	no
male	1987	bachelor's degree	no	no			United States	yes	23andMe									2	1	was not relevant	to a small extent	yes	a few months ago but less than two years	I visited openSNP a few times since data upload			yes, phenotypes			no, not yet but probably in the future	no, I am not interested in contacting other users	no, I am not interested in meeting other users	no, I am not interested in downloading data to conduct analyses	I did not read them at all	no		Personal Genome Project							yes, on Facebook					no
male	1970	bachelor's degree	yes	no			United States	yes	23andMe								Prometheas	3	1	2	to a moderate extent	yes	a few months ago but less than two years	I visited openSNP a few times since data upload		no, not yet but probably in the future				no, not yet but probably in the future	no, not yet but probably in the future	no, I am not interested in meeting other users	yes	I read them carefully	yes			Genomera						yes, on Facebook	yes, on Twitter	yes, on Google+			no
	1985	master's degree	no	no			Ukraine	yes	23andMe									3	1	2	to a moderate extent	yes	a few months ago but less than two years	I visited openSNP a few times since data upload		no, not yet but probably in the future				no, not yet but probably in the future	no, I am not interested in contacting other users	no, I am not interested in meeting other users	no, not yet but probably in the future	I only read them over quickly	no	no								yes, on Facebook	yes, on Twitter				no
male	1975	bachelor's degree	yes	no			United States	yes	23andMe									1	2	3	to a small extent	yes	a few months ago but less than two years	I visited openSNP a few times since data upload			yes, phenotypes			yes	no, not yet but probably in the future	no, but I would definitely like to	no, not yet but probably in the future	I only read them over quickly	no					DNA.land						yes, on Google+			no
male	1992	bachelor's degree	no	no			United States	yes	23andMe								FTDNA, Ancestry DNA	1	2	was not relevant	to a small extent	no
male	1987	master's degree	no		yes, as a professional	yes, as a research participant	Canada	yes	23andMe									3	1	2	not at all	yes	a few weeks ago	I visited openSNP a few times since data upload			yes, phenotypes			no, I am not interested in creating phenotypes	no, I am not interested in contacting other users	no, I am not interested in meeting other users	no, I am not interested in downloading data to conduct analyses	I did not read them at all	no					DNA.land				yes, on Facebook					no
male	1949	high school graduate	yes	no			United States	yes	23andMe								Ftdna	1	2	3	to a moderate extent	yes	more than two years ago	I visited openSNP only for uploading data		no, not yet but probably in the future				no, not yet but probably in the future	no, not yet but probably in the future	no, but I would definitely like to	no, not yet but probably in the future	I only read them over quickly	no					DNA.land		Gedmatch?		yes, on Facebook					no
female	1950	high school graduate	yes	no			United States	yes	23andMe									1	2	3	to a small extent	no
male	1970	master's degree	no			yes, as a research participant	United States	yes	23andMe							dna.ancestry	familytreedna.com	1	2	3	not at all	yes	more than two years ago	I visited openSNP a few times since data upload			yes, phenotypes			yes	no, I am not interested in contacting other users	no, I am not interested in meeting other users	no, I am not interested in downloading data to conduct analyses	I read them carefully	no							I submitted my full mtdna sequence to genbank and my ydna 67 STR markers to ysearch	no						no
female	1982	master's degree	no	no			United States	yes	23andMe										1	3	not at all	yes
female	1965	bachelor's degree	no	no			United States	yes	23andMe							dna.ancestry		1	2	was not relevant	to a moderate extent	yes	a few months ago but less than two years	I visited openSNP a few times since data upload		no, not yet but probably in the future				no, not yet but probably in the future	no, I am not interested in contacting other users	no, I am not interested in meeting other users	no, I am not interested in downloading data to conduct analyses	I read them carefully	no					DNA.land				yes, on Facebook	yes, on Twitter	yes, on Google+	yes, on PatientsLikeMe		no
male	1992	master's degree	no	no			Sweden	yes	23andMe									3	2	1	not at all	yes	a few months ago but less than two years	I visited openSNP only for uploading data	no, I am not interested in uploading other data					no, I am not interested in creating phenotypes	no, I am not interested in contacting other users	no, I am not interested in meeting other users	no, I am not interested in downloading data to conduct analyses	I did not read them at all	yes		Personal Genome Project							yes, on Facebook		yes, on Google+			no
male	1938	master's degree	yes	no			United States	yes	23andMe							dna.ancestry		1	was not relevant	was not relevant	not at all	yes	a few months ago but less than two years	I visited openSNP only for uploading data	no, I am not interested in uploading other data					no, I am not interested in creating phenotypes	yes, I have contacted only one person	no, but I would definitely like to	no, I am not interested in downloading data to conduct analyses	I did not read them at all	no	no								yes, on Facebook		yes, on Google+			no
male	1990	bachelor's degree	no	no			United States	yes	23andMe									2	1	3	to a small extent	yes	a few months ago but less than two years	I visited openSNP only for uploading data		no, not yet but probably in the future				no, not yet but probably in the future	no, I am not interested in contacting other users	no, I am not interested in meeting other users	no, I am not interested in downloading data to conduct analyses	I only read them over quickly	no		Personal Genome Project							yes, on Facebook	yes, on Twitter	yes, on Google+			no
female	1948	doctorate (Ph.D.)	yes		yes, as a professional		Canada	yes	23andMe									3		2	to a small extent	yes	more than two years ago	I visit openSNP occasionally						no, I am not interested in creating phenotypes	no, I am not interested in contacting other users	no, I am not interested in meeting other users	no, I am not interested in downloading data to conduct analyses	I only read them over quickly	no							Yes, my 23andMe data is on GED match. And I think I have also uploaded my exome sequence (from the 23andMe pilot program a few years ago) onto an open platform.			yes, on Twitter	yes, on Google+			no
male	1985	bachelor's degree	no	no			Israel	yes									ftdna my origins	1	3	2	not at all	yes	a few months ago but less than two years	I visited openSNP only for uploading data	no, I am not interested in uploading other data					no, I am not interested in creating phenotypes	no, I am not interested in contacting other users	no, I am not interested in meeting other users	no, I am not interested in downloading data to conduct analyses	I read them carefully	no							gedmatch , dna land	no						no
female	1958	high school graduate	yes			yes, as a research participant	United States	yes	23andMe								Complete Genomics (Personal Genome Project - I am PGP209)	3	2	1	to a moderate extent	yes	more than two years ago	I visit openSNP occasionally			yes, phenotypes	yes, ZIP code	yes, profile picture	no, I am not interested in creating phenotypes	no, I am not interested in contacting other users	no, I am not interested in meeting other users	no, I am not interested in downloading data to conduct analyses	I read them carefully	no		Personal Genome Project		OpenHumans			None, but I will look into Genomera and DNA.land; thank you for the suggestions.		yes, on Facebook		yes, on Google+
male	1973	bachelor's degree	no	no			United States	yes								dna.ancestry		2	2	was not relevant	to a small extent	yes	a few months ago but less than two years	I visit openSNP occasionally			yes, phenotypes			no, not yet but probably in the future	no, I am not interested in contacting other users	no, but I would definitely like to	no, I am not interested in downloading data to conduct analyses	I only read them over quickly	yes									yes, on Facebook					no
female	1976	high school graduate	yes	no			United States	yes	23andMe									2	1	3	to a small extent	yes
male	1983	high school graduate	no			yes, as a research participant	United States	yes								dna.ancestry	FTDNA, Geno 2.0, I had my gf tested at 23andMe	1	3	2	to a moderate extent	yes	a few months ago but less than two years	I visited openSNP a few times since data upload			yes, phenotypes	yes, ZIP code		yes	no, not yet but probably in the future	no, not yet but probably in the future	no, not yet but probably in the future	I only read them over quickly	no					DNA.land		Gedmatch	no						no
male	1965	doctorate (Ph.D.)	no	no			Canada	yes	23andMe								Ancestry and FTDNA. Although I did not test there, my date is uploaded to deCODEme	1	2	was not relevant	not at all	yes	more than two years ago	I visited openSNP a few times since data upload			yes, phenotypes			yes	no, I am not interested in contacting other users	no, I am not interested in meeting other users	no, I am not interested in downloading data to conduct analyses	I only read them over quickly	yes					DNA.land	Your own personal website	Mine is publically available on multiple personal pages and I upload anywhere that comes to mind. A notably m,issing site here is GEDmatch.com		yes, on Facebook		yes, on Google+			no
male	1986	doctorate (Ph.D.)	no		yes, as a professional		Canada	yes	23andMe									2	1	3	to a small extent	yes
female	1975	high school graduate	yes	no			United States	yes	23andMe							dna.ancestry		2	1	3	to a moderate extent	yes	a few months ago but less than two years	I visited openSNP a few times since data upload			yes, phenotypes			yes	no, I am not interested in contacting other users	no, I am not interested in meeting other users	no, I am not interested in downloading data to conduct analyses	I only read them over quickly	no					DNA.land				yes, on Facebook					no
female	1964	master's degree	yes	no			United States	yes	23andMe								LiveWello, DNA Land, Genes for Good	2	1	3	to a moderate extent	no
male	1961	bachelor's degree	no	no			United Kingdom	yes	23andMe									1	2	3	not at all	yes	a few weeks ago	I visit openSNP occasionally		no, not yet but probably in the future				no, not yet but probably in the future	no, I am not interested in contacting other users	no, I am not interested in meeting other users	no, I am not interested in downloading data to conduct analyses	I read them carefully	no	no								yes, on Facebook	yes, on Twitter	yes, on Google+			no
male	1975	master's degree	no	no			United States	yes									familytreedna	3	2	1	not at all	yes	a few weeks ago	I visited openSNP only for uploading data		no, not yet but probably in the future				no, not yet but probably in the future	no, not yet but probably in the future	no, not yet but probably in the future	no, not yet but probably in the future	I only read them over quickly	no	no								yes, on Facebook	yes, on Twitter	yes, on Google+			no
male	1992	master's degree	no		yes, as a professional		United States	no
male	1974	bachelor's degree	yes	no			United States	yes								dna.ancestry		2	3	1	not at all	no
female	1956	bachelor's degree	yes	no			United States	yes	23andMe									2	1	3	to a moderate extent	no
male	1984	doctorate (Ph.D.)	no		yes, as a professional		United Kingdom	yes	23andMe									2	1	3	to a small extent	no
male	1962	doctorate (Ph.D.)	yes	no			United States	yes	23andMe									1	2	3	to a small extent	yes	more than two years ago	I visit openSNP occasionally		no, not yet but probably in the future				no, not yet but probably in the future	no, I am not interested in contacting other users	no, I am not interested in meeting other users	no, I am not interested in downloading data to conduct analyses	I only read them over quickly	no	no								yes, on Facebook	yes, on Twitter				no
female	1966	master's degree	yes	no			United States	yes	23andMe										1	was not relevant	not at all	yes	more than two years ago	I visited openSNP a few times since data upload	no, I am not interested in uploading other data	no, not yet but probably in the future				no, I am not interested in creating phenotypes	no, not yet but probably in the future	no, but I would definitely like to	no, I am not interested in downloading data to conduct analyses	I did not read them at all	no			Genomera						yes, on Facebook	yes, on Twitter				no
female	1973	master's degree	yes	no			Poland	yes									Genographic, FamilyDNA	1	3	2	not at all	yes
male	1990	bachelor's degree	no	no			United States	no
female	1974	doctorate (Ph.D.)	no			yes, as a research participant	Venezuela	yes									IVIC	3	1	2	to a small extent	no
male	1938	master's degree	yes	no			Canada	yes	23andMe								family tree DNA, + one unknown other	1	2	3	not at all	no
male	1965	bachelor's degree	yes	no			Hungary	yes	23andMe								FTDNA	1	3	2	to a small extent	no
female	1979	bachelor's degree	yes		yes, as a professional		United States	yes	23andMe							dna.ancestry		1	2	3	to a small extent	yes	a few months ago but less than two years	I visit openSNP occasionally		no, not yet but probably in the future				no, not yet but probably in the future	no, not yet but probably in the future	no, not yet but probably in the future	no, not yet but probably in the future	I read them carefully	no		Personal Genome Project						no						no
female	1940	bachelor's degree	yes	no				yes	23andMe								FamilyTree DNA, Ancestry.com, Geno2	1	3	2	not at all	yes	more than two years ago	I visited openSNP a few times since data upload			yes, phenotypes			no, I am not interested in creating phenotypes	no, I am not interested in contacting other users	no, I am not interested in meeting other users	no, I am not interested in downloading data to conduct analyses	I only read them over quickly	yes	no								yes, on Facebook		yes, on Google+			no
male	1978	doctorate (Ph.D.)	yes		yes, as a professional		Belgium	yes
male	1981	master's degree	yes	no			United States	yes	23andMe									3	1	2	to a small extent	yes	more than two years ago	I visited openSNP only for uploading data		no, not yet but probably in the future				no, not yet but probably in the future	no, not yet but probably in the future	no, but I would definitely like to	no, not yet but probably in the future	I only read them over quickly	no	no								yes, on Facebook		yes, on Google+			no
female	1979	doctorate (Ph.D.)	no		yes, as a professional		South Africa	yes	23andMe									1	2	3	to a small extent	yes	a few months ago but less than two years	I visit openSNP occasionally			yes, phenotypes			no, not yet but probably in the future	no, not yet but probably in the future	no, but I would definitely like to	no, not yet but probably in the future	I only read them over quickly	no	no								yes, on Facebook
female	1992	bachelor's degree	no	no			United States	yes	23andMe										1	2	to a moderate extent	no
male	1965	bachelor's degree	yes	no			United States	yes								dna.ancestry	FTDNA	1	2	was not relevant	not at all	no
male	1940	bachelor's degree	yes	no			United States	yes	23andMe								Ancestry.com	3	1	2	to a moderate extent	yes	a few months ago but less than two years	I visited openSNP a few times since data upload		no, not yet but probably in the future				no, not yet but probably in the future	no, not yet but probably in the future	no, but I would definitely like to	no, I am not interested in downloading data to conduct analyses	I did not read them at all	no	no								yes, on Facebook	yes, on Twitter				no
male	1975	master's degree	no	no			Portugal	yes	23andMe									2	1	3	to a small extent	yes	more than two years ago	I visited openSNP a few times since data upload			yes, phenotypes			no, I am not interested in creating phenotypes	no, I am not interested in contacting other users	no, I am not interested in meeting other users	no, I am not interested in downloading data to conduct analyses	I only read them over quickly	no	no								yes, on Facebook					no
female	1955	bachelor's degree	yes	no			United States	yes	23andMe									2	1	3	to a large extent	yes	a few months ago but less than two years	I visit openSNP occasionally		no, not yet but probably in the future				no, not yet but probably in the future	yes, I have contacted only one person	no, not yet but probably in the future	no, not yet but probably in the future	I only read them over quickly	no					DNA.land				yes, on Facebook					no
female	1979	bachelor's degree	no	no			United States	yes	23andMe									1	2	was not relevant	to a small extent	no
female	1963	high school graduate	yes	no			United States	yes	23andMe									3	1	2	to a large extent	yes	more than two years ago	I visited openSNP a few times since data upload			yes, phenotypes	yes, ZIP code		no, not yet but probably in the future	no, I am not interested in contacting other users	no, not yet but probably in the future	no, I am not interested in downloading data to conduct analyses	I only read them over quickly	no		Personal Genome Project							yes, on Facebook	yes, on Twitter	yes, on Google+			no
female	1952	master's degree	yes	no			United States	yes	23andMe									was not relevant	was not relevant	was not relevant	to a large extent	no
female	1963	bachelor's degree	no	no			Switzerland	yes	23andMe									2	3	1	not at all	yes	a few months ago but less than two years	I visit openSNP occasionally			yes, phenotypes			no, I am not interested in creating phenotypes	no, I am not interested in contacting other users	no, I am not interested in meeting other users	no, I am not interested in downloading data to conduct analyses	I read them carefully	yes	no								yes, on Facebook				It is not linked to openSNP.
male	1965	bachelor's degree	yes	no			Canada	yes								dna.ancestry	FTDNA	1	was not relevant	2	to a moderate extent	no
								yes									Ftdna	1	2	3	to a small extent	yes	a few months ago but less than two years	I visited openSNP only for uploading data
male	1942	bachelor's degree	yes	no			United States	yes									Family Tree DNA	1	was not relevant	was not relevant	not at all	yes	more than two years ago	I visit openSNP occasionally		no, not yet but probably in the future				no, I am not interested in creating phenotypes	no, not yet but probably in the future	no, not yet but probably in the future	no, I am not interested in downloading data to conduct analyses	I only read them over quickly	no	no								yes, on Facebook					no
male	1961	master's degree	yes	no			Kazakhstan	yes
male	1960	doctorate (Ph.D.)	no		yes, as a professional		United States	yes	23andMe								Genographic Project	2	3	1	not at all	no
female	1974	doctorate (Ph.D.)	yes	no		yes, as a research participant	Singapore	yes	23andMe										2	1	to a moderate extent	no
male	1964	bachelor's degree	no	no			Brazil	yes	23andMe								FTDNA - Family Tree DNA	1	2	3	to a small extent	yes	a few months ago but less than two years	I visited openSNP a few times since data upload			yes, phenotypes		yes, profile picture	yes	no, not yet but probably in the future	no, but I would definitely like to	no, I am not interested in downloading data to conduct analyses	I only read them over quickly	no					DNA.land		gedmatch.com mitosearch ysearch		yes, on Facebook		yes, on Google+		linkedin	no
female	1955	bachelor's degree	yes	no			United States	yes	23andMe									2	1	3	to a small extent	yes	a few weeks ago	I visited openSNP a few times since data upload		no, not yet but probably in the future				no, not yet but probably in the future	no, not yet but probably in the future	no, not yet but probably in the future	yes	I only read them over quickly	no		Personal Genome Project							yes, on Facebook					no
male	1978	bachelor's degree	no	no			Jersey (UK)	yes	23andMe										2	was not relevant	to a moderate extent	no
male	1957	doctorate (Ph.D.)	yes	no			Japan	no
female	1952	master's degree	yes			yes, as a research participant	Australia	yes	23andMe								Genetic Genie, LiveWello, Promethease	2	1	3	to a large extent	yes	a few months ago but less than two years	I visited openSNP a few times since data upload			yes, phenotypes			no, not yet but probably in the future	no, not yet but probably in the future	no, not yet but probably in the future	no, not yet but probably in the future	I read them carefully	no							GEDmatch	no						no
male	1984	high school graduate	no	no			Slovakia	yes	23andMe									1		3	to a small extent	yes	more than two years ago	I visited openSNP only for uploading data			yes, phenotypes			no, I am not interested in creating phenotypes	no, I am not interested in contacting other users	no, I am not interested in meeting other users	no, I am not interested in downloading data to conduct analyses	I only read them over quickly	no	no										yes, on Google+			no
female	1972	bachelor's degree	yes	no			United States	yes	23andMe									2	1	3	to a small extent	yes	a few months ago but less than two years	I visit openSNP occasionally	no, I am not interested in uploading other data					no, not yet but probably in the future	no, I am not interested in contacting other users	no, I am not interested in meeting other users	no, I am not interested in downloading data to conduct analyses	I only read them over quickly	no					DNA.land				yes, on Facebook	yes, on Twitter	yes, on Google+			no
male	1947	high school graduate	yes	no			Spain	yes									FamilyTreeDNA	1	was not relevant	2	to a small extent	yes	more than two years ago	I visited openSNP a few times since data upload			yes, phenotypes			no, not yet but probably in the future	no, not yet but probably in the future	no, but I would definitely like to	no, I am not interested in downloading data to conduct analyses	I only read them over quickly	no					DNA.land				yes, on Facebook	yes, on Twitter				no
male	1986	master's degree	no	no			Norway	yes	23andMe							dna.ancestry		3	2	1	to a small extent	yes	more than two years ago	I visited openSNP a few times since data upload			yes, phenotypes			yes	no, I am not interested in contacting other users	no, I am not interested in meeting other users	yes	I only read them over quickly	no	no								yes, on Facebook	yes, on Twitter	yes, on Google+			no
male	1982	doctorate (Ph.D.)	no		yes, as a professional		Austria	yes	23andMe									3	1	2	to a small extent	yes	more than two years ago	I visited openSNP only for uploading data	no, I am not interested in uploading other data					no, I am not interested in creating phenotypes	no, I am not interested in contacting other users	no, I am not interested in meeting other users	yes	I only read them over quickly	no	no								yes, on Facebook	yes, on Twitter	yes, on Google+			no
male	1965	high school graduate	yes	no			Russia	yes
male	1974	high school graduate	no	no			Luxembourg	yes	23andMe									2	1	3	to a moderate extent	yes	a few months ago but less than two years	I visited openSNP a few times since data upload		no, not yet but probably in the future				no, not yet but probably in the future	no, not yet but probably in the future	no, but I would definitely like to	no, I am not interested in downloading data to conduct analyses	I did not read them at all	no				OpenHumans	DNA.land	Your own personal website			yes, on Facebook					no
male	1974	high school graduate	yes	no			Russia	yes	23andMe									1		2	to a moderate extent	yes	a few months ago but less than two years	I visited openSNP a few times since data upload		no, not yet but probably in the future				no, not yet but probably in the future	yes, I have contacted only one person	no, but I would definitely like to	no, not yet but probably in the future	I did not read them at all	no	no								yes, on Facebook				Vkontakte	no
male	1987	master's degree	no	no			Russia	no
male	1977	high school graduate	no	no			Sweden	yes	23andMe									3	1	2	to a moderate extent	yes	more than two years ago	I visited openSNP only for uploading data		no, not yet but probably in the future				no, not yet but probably in the future	no, not yet but probably in the future	no, not yet but probably in the future	no, not yet but probably in the future	I did not read them at all	no	no								yes, on Facebook	yes, on Twitter	yes, on Google+			no
male	1946	bachelor's degree	yes				United Kingdom	yes	23andMe								Argus (no longer in this business)	2		1	not at all	yes	more than two years ago	I visit openSNP regularly	no, I am not interested in uploading other data					no, I am not interested in creating phenotypes	yes, I have contacted several people	no, I am not interested in meeting other users	yes	I read them carefully	no						Your own personal website		no						no
female	1958	bachelor's degree	no	no			United Kingdom	yes	23andMe									2	1	3	to a small extent	yes	a few months ago but less than two years	I visited openSNP only for uploading data		no, not yet but probably in the future				no, not yet but probably in the future	no, not yet but probably in the future	no, I am not interested in meeting other users	no, I am not interested in downloading data to conduct analyses	I only read them over quickly	no					DNA.land				yes, on Facebook	yes, on Twitter				no
male	1974	master's degree	yes	no			Switzerland	no
male	1990	bachelor's degree	no	no			Switzerland	yes	23andMe									3	1	2	to a small extent	yes	more than two years ago	I visited openSNP only for uploading data		no, not yet but probably in the future				no, I am not interested in creating phenotypes	no, I am not interested in contacting other users	no, I am not interested in meeting other users	no, I am not interested in downloading data to conduct analyses	I did not read them at all	no	no								yes, on Facebook	yes, on Twitter	yes, on Google+			no
female	1974	doctorate (Ph.D.)	yes		yes, as a professional		Kuwait	no
male	1983	high school graduate	no	no			Germany	yes	23andMe									1	2	3	to a small extent	yes	a few months ago but less than two years	I visited openSNP a few times since data upload		no, not yet but probably in the future				no, not yet but probably in the future	no, not yet but probably in the future	no, but I would definitely like to	no, I am not interested in downloading data to conduct analyses	I read them carefully	no							GedMatch, Promethease		yes, on Facebook					no
male	1949	bachelor's degree	no	no			United States	yes	23andMe										3	1	to a large extent	no
male	1980	master's degree	yes			yes, as a research participant	France	yes	23andMe								Y-SEQ	1	2	3	to a small extent	yes	a few months ago but less than two years	I visited openSNP a few times since data upload	no, I am not interested in uploading other data					no, I am not interested in creating phenotypes	no, I am not interested in contacting other users	no, I am not interested in meeting other users	no, I am not interested in downloading data to conduct analyses	I read them carefully	no					DNA.land		GEDmatch.com					yes, on PatientsLikeMe	LinkedIn	no
male	1986	bachelor's degree	no	no			Algeria	yes	23andMe								ftDNA			3	to a small extent	yes	more than two years ago	I visited openSNP a few times since data upload			yes, phenotypes			yes	no, I am not interested in contacting other users	no, I am not interested in meeting other users	no, not yet but probably in the future	I read them carefully	no					DNA.land			no						no
male	1976	high school graduate	yes			yes, as a research participant	Russia	yes	23andMe								ftdna, gedmatch	1	2	3	to a small extent	no
male	1988	master's degree	no		yes, as a professional		United Kingdom	yes	23andMe									2	1	3	to a small extent	yes	a few months ago but less than two years	I visit openSNP occasionally			yes, phenotypes			no, I am not interested in creating phenotypes	no, not yet but probably in the future	yes	yes	I read them carefully	no									yes, on Facebook	yes, on Twitter	yes, on Google+
male	1983	bachelor's degree	no	no			Australia	yes	23andMe									3	2	1	not at all	yes	a few weeks ago	I visited openSNP only for uploading data		no, not yet but probably in the future				no, I am not interested in creating phenotypes	no, I am not interested in contacting other users	no, I am not interested in meeting other users	no, I am not interested in downloading data to conduct analyses	I only read them over quickly	no					DNA.land				yes, on Facebook	yes, on Twitter				no
male	1963	high school graduate	yes	no			United Kingdom	yes	23andMe							dna.ancestry		1	was not relevant	2	not at all	yes	a few months ago but less than two years	I visited openSNP a few times since data upload		no, not yet but probably in the future				no, not yet but probably in the future	no, not yet but probably in the future	no, not yet but probably in the future	no, not yet but probably in the future	I did not read them at all	no							It's been a while since I have shared any further information.		yes, on Facebook					no
female	1987	master's degree	no		yes, as a professional		Turkey	yes	23andMe									2	1	3	to a moderate extent	yes	a few months ago but less than two years	I visited openSNP only for uploading data		no, not yet but probably in the future				no, not yet but probably in the future	no, not yet but probably in the future	no, not yet but probably in the future	no, not yet but probably in the future	I only read them over quickly	no		Personal Genome Project						no						no
female	1962	bachelor's degree	yes	no			United States	no
male	1961	master's degree	yes	no			Australia	yes	23andMe								Family Tree DNA	3	2	1	to a small extent	yes	a few months ago but less than two years	I visited openSNP only for uploading data		no, not yet but probably in the future				no, not yet but probably in the future	no, not yet but probably in the future	no, I am not interested in meeting other users	no, not yet but probably in the future	I only read them over quickly	yes							GEDMATCH, ysearch.org	no						no
male	1985	master's degree	no	no			Switzerland	no
male	1977	master's degree	yes	no			Russia	yes									FTDNA	1	3	2	not at all	yes	a few months ago but less than two years	I visited openSNP a few times since data upload			yes, phenotypes		yes, profile picture	yes	no, not yet but probably in the future	no, not yet but probably in the future	no, not yet but probably in the future	I only read them over quickly	no	no								yes, on Facebook		yes, on Google+			no
male	1955	high school graduate	no	no			United States	yes	23andMe									1	2	3	not at all	yes	more than two years ago	I visited openSNP a few times since data upload		no, not yet but probably in the future				no, I am not interested in creating phenotypes	no, I am not interested in contacting other users	no, I am not interested in meeting other users	no, I am not interested in downloading data to conduct analyses	I only read them over quickly	no														no
male	1975	doctorate (Ph.D.)	no	no			France	yes									family finder	1	was not relevant	was not relevant	not at all	no
female	1985	bachelor's degree	no	no			United States	yes	23andMe							dna.ancestry	FTDNA family finder autosomal and FTDNA mitochondrial	1	2	3	to a large extent	yes	more than two years ago	I visited openSNP a few times since data upload			yes, phenotypes			no, not yet but probably in the future	no, not yet but probably in the future	no, but I would definitely like to	no, not yet but probably in the future	I read them carefully	no					DNA.land	Your own personal website			yes, on Facebook		yes, on Google+			no
male	1970	master's degree	yes	no			Germany	no
male	1948	doctorate (Ph.D.)	yes			yes, as a research participant	Germany	yes	23andMe	bio.logis							Humatrix	1		3	to a large extent	no
male	1952	master's degree	no	no			France	yes	23andMe										1	3	to a large extent	yes	a few weeks ago	I visited openSNP a few times since data upload	no, I am not interested in uploading other data					no, I am not interested in creating phenotypes	no, I am not interested in contacting other users	no, I am not interested in meeting other users	no, I am not interested in downloading data to conduct analyses	I did not read them at all	no							athletigen,diygenomics.org,geneticgenie.org,interpretome,KnowYourGenetics.com,livewello,mthfr support,promethease	no						no
male	1978	doctorate (Ph.D.)	yes		yes, as a professional		Australia	yes	23andMe		deCODEme				Navigenics				2	1	to a small extent	no
male	1979	master's degree	no	no			Germany	yes	23andMe									1	3	2	to a small extent	yes	more than two years ago	I visited openSNP a few times since data upload		no, not yet but probably in the future				no, not yet but probably in the future	no, I am not interested in contacting other users	no, I am not interested in meeting other users	no, I am not interested in downloading data to conduct analyses	I read them carefully	no	no									yes, on Twitter	yes, on Google+			no
male	1971	master's degree	yes			yes, as a research participant	Croatia	yes									FTDNA	1	2	3	to a small extent	yes	more than two years ago	I visited openSNP a few times since data upload		no, not yet but probably in the future	yes, phenotypes		yes, profile picture	yes	yes, I have contacted only one person	no, but I would definitely like to	no, not yet but probably in the future	I read them carefully	no			Genomera		DNA.land				yes, on Facebook	yes, on Twitter	yes, on Google+			no
male	1991	high school graduate	no	no			United States	yes	23andMe									2	1	was not relevant	to a large extent	yes	a few months ago but less than two years	I visited openSNP only for uploading data	no, I am not interested in uploading other data	no, not yet but probably in the future				no, I am not interested in creating phenotypes	no, not yet but probably in the future	no, I am not interested in meeting other users	no, I am not interested in downloading data to conduct analyses	I did not read them at all	no	no							no						no
male	1994	high school graduate	no	no			Czech Republic	yes	23andMe									3	1	2	to a small extent	yes	a few months ago but less than two years	I visited openSNP a few times since data upload	no, I am not interested in uploading other data					no, I am not interested in creating phenotypes	no, I am not interested in contacting other users	no, I am not interested in meeting other users	no, I am not interested in downloading data to conduct analyses	I read them carefully	no					DNA.land	Your own personal website			yes, on Facebook	yes, on Twitter	yes, on Google+			no
male	1965	high school graduate	yes	no			Germany	yes	23andMe								FTDNA,Geno2,DNATribes	1	2	3	not at all	yes	a few months ago but less than two years	I visit openSNP occasionally		no, not yet but probably in the future				yes	no, I am not interested in contacting other users	no, I am not interested in meeting other users	no, not yet but probably in the future	I only read them over quickly	no					DNA.land				yes, on Facebook					no
male	1970	doctorate (Ph.D.)					United States	yes	23andMe									2	1	3	to a moderate extent	no
female	1960	high school graduate	yes			yes, as a research participant	United States	yes	23andMe							dna.ancestry		3	2	1	to a moderate extent	yes	a few months ago but less than two years	I visited openSNP only for uploading data	no, I am not interested in uploading other data	no, not yet but probably in the future				no, not yet but probably in the future	no, not yet but probably in the future	no, not yet but probably in the future	no, not yet but probably in the future	I only read them over quickly	no	no								yes, on Facebook	yes, on Twitter	yes, on Google+			no
female	1970	bachelor's degree	yes			yes, as a research participant	United States	yes	23andMe								AncestryDNA	2	1	3	to a moderate extent	yes	a few months ago but less than two years	I visited openSNP only for uploading data		no, not yet but probably in the future				no, not yet but probably in the future	no, not yet but probably in the future	no, but I would definitely like to	no, I am not interested in downloading data to conduct analyses	I only read them over quickly	no							Gedmatch		yes, on Facebook					no
male	1983	master's degree	no	no			United States	yes	23andMe									2	1	was not relevant	to a small extent	yes	more than two years ago	I visit openSNP occasionally			yes, phenotypes	yes, ZIP code	yes, profile picture	yes	yes, I have contacted several people	no, but I would definitely like to	no, not yet but probably in the future	I did not read them at all	no		Personal Genome Project							yes, on Facebook	yes, on Twitter	yes, on Google+	yes, on PatientsLikeMe		no
male	1980	doctorate (Ph.D.)	no		yes, as a professional	yes, as a research participant	Spain	yes									FTDNA, genographic project	2	was not relevant	1	not at all	no
male	1959	master's degree	yes	no			Czech Republic	yes									FTDNA	2	1	3	to a moderate extent	no
male	1980	doctorate (Ph.D.)	yes	no			Bulgaria	yes	23andMe									3	1	2	to a moderate extent	yes	more than two years ago	I visited openSNP only for uploading data		no, not yet but probably in the future				no, not yet but probably in the future	no, not yet but probably in the future	no, but I would definitely like to	no, not yet but probably in the future	I only read them over quickly	no	no								yes, on Facebook	yes, on Twitter	yes, on Google+			no
male	1983	doctorate (Ph.D.)	no			yes, as a research participant	Italy	no
male	1971	master's degree	yes	no			Australia	yes	23andMe									2	1	3	to a large extent	yes	more than two years ago	I visited openSNP only for uploading data			yes, phenotypes			no, not yet but probably in the future	no, I am not interested in contacting other users	no, I am not interested in meeting other users	no, not yet but probably in the future	I did not read them at all	no	no						Used nutrahacker.com, livewello.com, geneticgenie.com knowyourgenetics.com and promethease.com	no						no
male	1991	master's degree	no				India	no
male	1970	doctorate (Ph.D.)	yes		yes, as a professional	yes, as a research participant	United States	yes	23andMe							dna.ancestry	Personal Genome Project - Complete Genomics 80X whole genome sequencing	1	2	3	to a small extent	yes	a few weeks ago	I visited openSNP a few times since data upload			yes, phenotypes			no, not yet but probably in the future	no, not yet but probably in the future	no, not yet but probably in the future	no, not yet but probably in the future	I read them carefully	yes		Personal Genome Project			DNA.land				yes, on Facebook	yes, on Twitter	yes, on Google+			no
female	1978	bachelor's degree	no			yes, as a research participant	United States	yes	23andMe									3	1	2	to a small extent	yes	more than two years ago	I visited openSNP a few times since data upload			yes, phenotypes			no, not yet but probably in the future	no, I am not interested in contacting other users	no, I am not interested in meeting other users	no, I am not interested in downloading data to conduct analyses	I only read them over quickly	yes	no							no					LinkedIn
male	1980	bachelor's degree	no				India	yes	23andMe									3	2	1	not at all	yes	more than two years ago	I visited openSNP a few times since data upload			yes, phenotypes	yes, ZIP code	yes, profile picture	yes	no, not yet but probably in the future	no, not yet but probably in the future	yes	I only read them over quickly	no		Personal Genome Project		OpenHumans		Your own personal website	http://thejeshgn.com/dna		yes, on Facebook	yes, on Twitter
male	1946	doctorate (Ph.D.)	yes		yes, as a professional		Switzerland	yes	23andMe									2	1	was not relevant	not at all	no
male	1944	high school graduate	yes	no			Australia	yes	23andMe								FTDNA	3	1	2	not at all	no
male	1974	master's degree	yes		yes, as a professional		France	yes								dna.ancestry	FT DNA		3	1	not at all	no
male	1953	high school graduate	no	no			United States	yes									FTDNA (BIG Y, FULL SEQ MTDNA, FAMILY FINDER AUTOSOMAL DNA, CLAN DONALD, YFULL, YSEQ, NATIONAL GENOME PROJECT (GENO 2.0)	1	was not relevant	2	not at all	no
male	1971	doctorate (Ph.D.)	yes	no			United Kingdom	no
male	1975	high school graduate	yes	no			Bahrain	yes									Ftdna	1	2	3	to a small extent	no
male	1983	master's degree	yes	no			Spain	yes									FamilyTree DNA	1	was not relevant	2	not at all	yes	more than two years ago	I visited openSNP only for uploading data		no, not yet but probably in the future				no, I am not interested in creating phenotypes	no, not yet but probably in the future	no, but I would definitely like to	no, I am not interested in downloading data to conduct analyses	I only read them over quickly	no					DNA.land		Gedmatch	no						no
female	1995	high school graduate	no	no			United Kingdom	yes									Familytreedna	1		2	to a small extent	yes	a few months ago but less than two years	I visited openSNP only for uploading data	no, I am not interested in uploading other data					no, not yet but probably in the future	no, I am not interested in contacting other users	no, I am not interested in meeting other users	no, I am not interested in downloading data to conduct analyses	I did not read them at all	no	no							no						no
female	1979	doctorate (Ph.D.)	yes		yes, as a professional	yes, as a research participant	United States	yes	23andMe									2	3	1	to a small extent	yes	a few months ago but less than two years	I visited openSNP a few times since data upload			yes, phenotypes			no, I am not interested in creating phenotypes	no, not yet but probably in the future	no, not yet but probably in the future	no, not yet but probably in the future	I only read them over quickly	no		Personal Genome Project		OpenHumans	DNA.land				yes, on Facebook	yes, on Twitter				no
male	1989	bachelor's degree	no		yes, as a professional		Denmark	yes	23andMe								dna.land, promethease	1	2	3	not at all	yes	more than two years ago	I visited openSNP a few times since data upload			yes, phenotypes			no, not yet but probably in the future	no, not yet but probably in the future	no, not yet but probably in the future	yes	I did not read them at all	no					DNA.land	Your own personal website			yes, on Facebook	yes, on Twitter	yes, on Google+		researchgate	no
female	1976	doctorate (Ph.D.)	yes		yes, as a professional		United Kingdom	yes	23andMe								Geographic project	3	2	1	to a small extent	yes	a few months ago but less than two years	I visited openSNP a few times since data upload		no, not yet but probably in the future				no, I am not interested in creating phenotypes	no, I am not interested in contacting other users	no, I am not interested in meeting other users	yes	I only read them over quickly	no							Gedmatch	no						no
male	1985	high school graduate	yes	no			United States	yes									FamilyTree DNA and National Genographic	1	was not relevant	2	not at all	yes	a few months ago but less than two years	I visited openSNP only for uploading data		no, not yet but probably in the future				no, I am not interested in creating phenotypes	no, not yet but probably in the future	no, I am not interested in meeting other users	no, I am not interested in downloading data to conduct analyses	I only read them over quickly	no	no							no						no
male	1972	doctorate (Ph.D.)	yes	no			Switzerland	no
male	1986	bachelor's degree	no	no			United States	yes	23andMe									3	1	2	to a small extent	yes	a few months ago but less than two years	I visited openSNP a few times since data upload			yes, phenotypes	yes, ZIP code		no, not yet but probably in the future	no, not yet but probably in the future	no, I am not interested in meeting other users	no, not yet but probably in the future	I only read them over quickly	no		Personal Genome Project				Your own personal website			yes, on Facebook	yes, on Twitter	yes, on Google+			no
male	1972	bachelor's degree	yes	no			United States	no
female	1978	high school graduate	yes	no			United States	yes	23andMe										2	3	not at all	no
male	1981	master's degree	yes	no			Czech Republic	yes	23andMe									1	2	3	to a small extent	yes	a few months ago but less than two years	I visited openSNP only for uploading data		no, not yet but probably in the future				no, not yet but probably in the future	no, not yet but probably in the future	no, I am not interested in meeting other users	no, I am not interested in downloading data to conduct analyses	I did not read them at all	yes					DNA.land		gedmatch		yes, on Facebook	yes, on Twitter	yes, on Google+			no
female	1956	bachelor's degree	yes	no			United States	yes									Sorenson	1	2		not at all	no
male	1948	bachelor's degree	yes	no			United States	yes	23andMe								FTDNA	1	2	3	not at all	yes	a few months ago but less than two years	I visited openSNP a few times since data upload		no, not yet but probably in the future				no, not yet but probably in the future	no, not yet but probably in the future	no, but I would definitely like to	no, not yet but probably in the future	I read them carefully	no					DNA.land				yes, on Facebook		yes, on Google+			no
male	1979	high school graduate	no	no			Canada	yes	23andMe									1	2	3	not at all	yes	a few months ago but less than two years	I visited openSNP only for uploading data	no, I am not interested in uploading other data					no, not yet but probably in the future	no, not yet but probably in the future	no, but I would definitely like to	no, I am not interested in downloading data to conduct analyses	I only read them over quickly	yes							Gedmatch		yes, on Facebook	yes, on Twitter	yes, on Google+			no
female	1974	bachelor's degree	no				United States	yes	23andMe							dna.ancestry		1	3	2	not at all	yes	a few weeks ago	I visit openSNP occasionally		no, not yet but probably in the future				no, not yet but probably in the future	no, not yet but probably in the future	no, I am not interested in meeting other users	no, not yet but probably in the future		no					DNA.land				yes, on Facebook	yes, on Twitter	yes, on Google+
male	1979	high school graduate	no			yes, as a research participant	Russia	yes	23andMe									1	2	3	not at all	yes	a few months ago but less than two years	I visit openSNP occasionally			yes, phenotypes			no, not yet but probably in the future	no, not yet but probably in the future	no, not yet but probably in the future	yes	I read them carefully	no	no								yes, on Facebook	yes, on Twitter	yes, on Google+			no
female	1950	bachelor's degree	yes	no			United States	yes	23andMe								family tree DNA	1	2	3	to a small extent	yes	more than two years ago	I visited openSNP a few times since data upload		no, not yet but probably in the future				no, not yet but probably in the future	no, not yet but probably in the future	no, not yet but probably in the future	no, I am not interested in downloading data to conduct analyses	I only read them over quickly	no					DNA.land		gedmatch.com		yes, on Facebook	yes, on Twitter	yes, on Google+			no
male	1978	doctorate (Ph.D.)	yes		yes, as a professional		Japan	no
male	1954	bachelor's degree	no	no			Australia	yes	23andMe								FamilyTree DNA	1	2	3	not at all	yes	a few months ago but less than two years	I visited openSNP only for uploading data		no, not yet but probably in the future				no, not yet but probably in the future	no, not yet but probably in the future	no, not yet but probably in the future	no, I am not interested in downloading data to conduct analyses	I only read them over quickly	no					DNA.land				yes, on Facebook					no
male	1987	master's degree	no		yes, as a professional		Russia	yes	23andMe									2	1	was not relevant	to a moderate extent	yes	more than two years ago	I visit openSNP occasionally	no, I am not interested in uploading other data	no, not yet but probably in the future				no, I am not interested in creating phenotypes	no, I am not interested in contacting other users	no, I am not interested in meeting other users	no, not yet but probably in the future	I did not read them at all	no	no								yes, on Facebook					no
male	1985	master's degree	no		yes, as a professional	yes, as a research participant	Germany	yes	23andMe								Personal Exome Project, BGI GeneBook	3	2	1	to a small extent	yes	more than two years ago	I visit openSNP occasionally			yes, phenotypes		yes, profile picture	yes	yes, I have contacted several people	yes	yes	I read them carefully	yes			Genomera				GitHub		yes, on Facebook	yes, on Twitter	yes, on Google+
								yes														yes
[truncated: 138 more columns]
